# Supplementary material for: Evolution of diapause in the African turquoise killifish by remodeling ancient gene regulatory landscape
Source: bioRxiv or medRxiv preprint supplement (doi:10.1101/2021.10.25.465616), 2021-10-25
Supplement: Supplementary file [file media-1.pdf]

649 Supplementary Materials for

650

651 **Evolution of diapause in the African killifish by remodeling**

652 **ancient gene regulatory landscape**

653 Param Priya Singh, G. Adam Reeves, Kévin Contrepois, Mathew Ellenberger, Chi-Kuo Hu,  
654 Michael P. Snyder, Anne Brunet\*

655  
656 \*Corresponding author email: [abrunet1@stanford.edu](mailto:abrunet1@stanford.edu)

657

658 **This PDF file includes:**

659 Materials and Methods

660 References 81–131

661 Figs. S1 to S17

662 Table S1

663

664

665 **Other Supplementary Material for this manuscript includes the following:**

666

667 Data Files S1 to S8 as Excel File.

668

669

670

671

672

673

674

675

## 676 MATERIAL AND METHODS

677 All the RNA-seq and ATAC-seq data generated in this study have been deposited to NCBI-GEO  
678 (accession # GSE185817) and can be accessed at:

679 <https://www.ncbi.nlm.nih.gov/geo/query/acc.cgi?acc=GSE185817>. All the lipidomics data  
680 generated in this study have been deposited to the Metabolomic Workbench (Study ID ST001898)  
681 and can be accessed at:

682 <http://dev.metabolomicsworkbench.org:22222/data/DRCCMetadata.php?Mode=Study&StudyID=ST001898&Access=NguY6247>. All the code for data analysis can be accessed on GitHub at:  
683 <https://github.com/param-p-singh/Diapause-multiomics>  
684

685

### 686 1. Identification and dating of paralogs

687

688 To generate a comprehensive resource of paralogs in multiple killifish species and to date their  
689 duplication time relative to other species, we used the OrthoFinder pipeline (15, 81). To this end,  
690 we collected genome sequences from multiple killifish species with and without diapause from  
691 published reports and NCBI genome (8, 9, 26), other teleost fish, mammals, and non-vertebrate  
692 outgroups from Ensembl (version 100) (82) (fig. S2, B and D). Phylogenetic tree-based inference  
693 of orthologs, paralogs, and relative duplication timing of each paralog in all these species was done  
694 by OrthoFinder (fig. S2A). OrthoFinder infers orthogroups or gene families, orthologs between  
695 each species pair, the complete set of gene trees for all orthogroups, the rooted species tree, and  
696 all gene duplication events and their relative duplication time based on a phylogenetic approach  
697 (15, 81). For the species used in our analysis, we filtered out the paralog gene pairs with >20  
698 partners for a gene to exclude large multigene families with inflated paralog numbers. Our results  
699 were not dependent on the paralog family size (fig. S4, D and E). Duplication node and  
700 approximate timing of the duplication (in Million Years [MY]) for each paralog pair was annotated  
701 based on known phylogenetic tree from Ensembl for species covered in Ensembl version 100 (82)  
702 or published reports for killifish species (14). To ensure that our results were not affected by the  
703 choice of species and outgroups used, we used 3 different sets of species to run the complete  
704 OrthoFinder pipeline independently: a set of 71 species, 31 species, and 13 species (fig. S2, B and  
705 D). The three pipelines resulted in very similar estimates of relative duplication time for killifish  
706 paralogs and the results were qualitatively identical (Fig. 1E and fig. S4, A to E). We used paralogs

707 identified by OrthoFinder analysis with 71 species for our study (20,091 paralog pairs in African  
708 turquoise killifish, *Nothobranchius furzeri* and 22,955 pairs in the South American killifish,  
709 *Austrofundulus limnaeus* genomes).

710 In addition to OrthoFinder, we also annotated the paralog duplication timings in the African  
711 turquoise killifish directly from Ensembl version 84 using an independent approach. To identify  
712 the paralog pairs in the African turquoise killifish genome, we first identified high confidence one-  
713 to-one orthologs (bi-directional best hits) between the African turquoise killifish and each of the 5  
714 teleost fish species (zebrafish, *Danio rerio*; medaka, *Oryzias latipes*; stickleback, *Gasterosteus*  
715 *aculeatus*; tetraodon, *Tetraodon nigroviridis*; and fugu, *Takifugu rubripes*) using BLASTp (E-  
716 value 1e-03) (83). We next identified paralogs in each of the five teleost fish for which both the  
717 genes had one-to-one orthologs in African turquoise killifish, and assigned their duplication time  
718 to the African turquoise killifish paralog. Because Ensembl did not have any killifish species, the  
719 paralogs duplicated in the killifish lineages after the divergence from medaka would be missed.  
720 Therefore, to identify such paralog pairs, we performed a protein family clustering using all the  
721 protein coding genes for multiple killifish species with and without diapause along with other  
722 teleost fish. We then annotated the duplication time for each of the potential paralogs that were not  
723 already identified using the ortholog analysis as “teleost” (if they were shared with the other teleost  
724 fish), “aplocheiloidei” (i.e. common ancestor of all killifish, if it was shared only by killifish  
725 species without diapause), and “nothobranchius” or “*Nothobranchius furzeri*” (shared by  
726 nothobranchius genus or only present in the African turquoise killifish, respectively).

727 To simplify the interpretation and analysis, the relative duplication nodes from each  
728 analysis were divided into 3 categories: *very ancient* (paralogs duplicated in the ancestor of jawed  
729 vertebrates at nodes Gnathostomata and earlier i.e. >473.3 MY ago), *ancient* (paralogs shared by  
730 most teleost fish species, duplicated between nodes Ovalentaria and Gnathostomata at 111-473.3  
731 MY ago or earlier), *recent/very recent* (paralogs shared by most killifish species, duplicated  
732 between nodes Ovalentaria and *Nothobranchius furzeri* at < 111 MY ago) (82) (Fig 1D, figs. S2  
733 to S4). Diapause-specialized paralog numbers (see below) in each of the three categories were  
734 compared to the genome average in that category with 10,000 bootstraps resampling of 50%  
735 paralogs genome-wide (Fig. 1E, Fig. 2E and figs. S3 and S4).

736

737 **Identification of paralogs retained from whole genome duplication (WGD).** Paralogs retained  
738 from the whole genome duplication (also called ohnologs) are known to have distinct evolutionary  
739 and genomic properties (84). To identify how diapause evolution is affected by WGDs, we  
740 identified ohnologs in the African turquoise killifish genome retained from the two rounds of  
741 vertebrate ancestral WGDs (which occurred around 500-550 MY ago) or the teleost (bony) fish  
742 specific third round of WGD (which occurred around ~350-400 MY ago) using multi-genome  
743 synteny comparison implemented in the OHNOLOGS database (85, 86). Briefly, we compared  
744 macro-synteny (gene content on chromosomes irrespective of their exact order) between African  
745 turquoise killifish and multiple outgroup genomes diverged before the respective WGD (outgroup  
746 comparison) using OHNOLOGS v2 pipeline (86). A similar synteny comparison was performed  
747 between the regions in the African turquoise killifish genome in a genome-wide manner (self-  
748 comparison). To identify ohnologs, we used the paralogs sets generated from co-orthology analysis  
749 in Ensembl version 84 in the African turquoise killifish as our input and identified the ones that  
750 have a significant q-score (85) corresponding to the relaxed criteria (outgroup q-score < 0.05 and  
751 self-comparison q-score < 0.3; <http://ohnologs.curie.fr/>) (86). This resulted in 8,810 ohnologs from  
752 vertebrate WGDs and 3,109 ohnologs from the teleost fish specific WGD (fig. S3A).

753

754 **Classifying paralogs specialized for killifish diapause.** To identify African turquoise killifish  
755 paralog pairs that show signs of specialization of the gene expression pattern for diapause, we used  
756 the normalized RNA-seq expression from Hu et al. (6) (see below). This dataset consists of two  
757 stages during African turquoise killifish development (heartbeat onset and diapause escaped  
758 embryos 1-day post heartbeat onset) and three time points during diapause (diapause embryos at  
759 3 days, 6 days, and 1 month in diapause). To test robustness, we used several different criteria to  
760 identify diapause-specialized paralogs (different FDR cutoffs, and different combinations of  
761 differentially expressed genes). We first identified differentially expressed genes in all three  
762 diapause time points with respect to both development time points using DESeq2 (version 1.30.1)  
763 (87). A paralog gene pair was classified as having specialization of expression if one gene was  
764 significantly upregulated in one of the three diapause time points (FDR < 0.05) with respect to one  
765 of the two development stages, and the other partner gene was significantly downregulated in  
766 diapause or had a median expression in development higher than median expression in diapause.  
767 The slightly relaxed condition for development gene expression was used to maximize the number

768 of pairs with potential specialization for downstream analysis. This resulted in 6,247 paralog pairs  
769 with expression specialization in diapause with the 71 vertebrate OrthoFinder pipeline (Data File  
770 S2).

771  
772 We independently identified paralogs specialized for South American killifish diapause,  
773 using RNA-seq data of South American killifish embryos in diapause and development (4 days  
774 post diapause exit) from Wagner et al. (9). Paralogs with one gene significantly expressed (i.e.,  
775 upregulated) in diapause compared to development (FDR < 0.05), and the other gene significantly  
776 expressed (i.e., downregulated) in development compared to diapause (FDR < 0.05) were  
777 classified as specialized paralogs (2,480 pairs).

778

## 779 **2. Killifish husbandry and embryo sample collection**

780 The killifish and other outgroup species used in this study are listed in Table S1. All the killifish  
781 species used for data generation were housed in the Stanford Research Animal Facility II under  
782 the approved protocol (protocol #APLAC-13645). Animals were housed in automated circulating  
783 water system with pH maintained at 6-7.5 and conductivity maintained between 3500 and  
784 4500 $\mu$ S/cm with a 10% system water exchange every day by reverse osmosis treated water. Adult  
785 fish were manually fed Otohime fish diet (Reed Mariculture, Otohime C1 [Ep1 for the South  
786 American killifish]) twice a day during weekdays and once a day during weekends.

787 Newly hatched fries for all species were kept in 0.8-liter fry tanks at a density of 4-5 fries  
788 for first two weeks and then individually housed for next two weeks. Fries were fed newly hatched  
789 brine shrimps (Brine Shrimp Direct, 454GR) twice a day during weekdays, and once a day during  
790 weekends. Animals were sexed at 4 weeks of age and transferred to 2.8-liter tanks. For African  
791 turquoise killifish and South American killifish (with diapause), adult males and females were  
792 individually housed except for breeding. Red-striped killifish, and lyretail killifish adults were kept  
793 in pairs with one male and one female animal in each tank.

794 For breeding, African turquoise killifish and South American killifish (with diapause)  
795 males and females were transferred to breeding tanks for a period of ~5 hours. Breeding tanks had  
796 sand trays at the bottom for the African turquoise killifish and trays with extra coarse grade glass  
797 beads (30/40 Mesh, 425-560micron size, Kramer Industries Inc. USA) for the South American  
798 killifish as per the established protocols (6, 88-90). After ~5 hours, sand or glass beads were

799 filtered using a sieve to collect embryos. For the red-striped killifish and the lyretail killifish  
800 (without diapause), spawning mops constructed using green yarn were floated from the lid. The  
801 yarns were checked every day for embryos, and the embryos were carefully hand-picked.

802 We used young animals (1-3 months of age) for breeding and embryo collection. For each  
803 species, collected embryos were washed multiple times and live embryos were placed in Ringer's  
804 solution (Sigma-Aldrich, 96724) with 0.01% methylene blue at 26°C. Embryos were checked  
805 under a stereoscope every day and any dead embryos were removed.

806

807 **Staging of embryos.** Synchronized killifish embryos for African turquoise and South American  
808 killifish were collected within a tight (~5 hour) breeding window. Most collected embryos were at  
809 the 1-2 cell stage upon collection. We monitored embryos every day post-collection to observe the  
810 visual markers of diapause and development as previously described (6). Briefly, we used  
811 Kupffer's vesicle (KV), which is a transient embryonic organ present from early to middle  
812 somitogenesis as a marker to stage embryos that are about to reach diapause. KV-positive embryos  
813 reach the end of somitogenesis in 1-2 days and the loss of KV roughly coincides with the onset of  
814 heartbeat in killifish, followed by either diapause or continue development (6, 91). We counted the  
815 number of somites in KV-positive embryos and designated KV-positive embryos at 15-22 somites  
816 as our "*pre-diapause (Pre-Dia) stage*". Embryo morphology for all the killifish species was  
817 similar at this stage. This mid-somitogenesis time point also coincides with the vertebrate  
818 phylotypic period (the period of the most conserved gene expression pattern during vertebrate  
819 development) with available gene expression and chromatin accessibility data from multiple other  
820 fish species (21).

821 In killifish species with diapause, young mothers have most of their embryos develop  
822 directly, whereas more mature mothers (even before middle age) have an increased frequency of  
823 embryos in diapause (6, 92). This feature allows us to collect *pre-diapause* embryos, even though  
824 there are no known markers, as of yet, to determine if embryos at an earlier stage are destined to  
825 diapause. Therefore, for the African turquoise and South American killifish, we collected *pre-*  
826 *diapause (Pre-Dia)* embryos from the very first breeding session (first clutch) from young mothers  
827 and fathers (age 4-5 weeks) with most embryos expected to skip diapause and continue developing  
828 which ensured that we get development bound embryos at *pre-diapause (Pre-Dia)* stage.

829 Among the first visual markers of diapause is the slowing of the rate of heartbeat after its  
830 onset (6, 93). Therefore, we next monitored the onset of heartbeat, and stage diapause embryos at  
831 6 days (*Dia 6d*) and 1 month of diapause (*Dia 1m*) as exhibiting a continuously decreasing  
832 heartbeat rate since diapause onset (<45 beat-per-minute (BPM)) as described in Hu et al (6). For  
833 embryos in 1 month diapause (*Dia 1m*), we additionally made sure that there was no heartbeat by  
834 monitoring them for 5 minutes under a stereoscope to verify that they were not prematurely exiting  
835 the diapause state. For embryos in development, embryos that had an increase in heartbeat rate 1  
836 day after heartbeat onset (>45 BPM), but before the visual pigmentation in eyes was developed  
837 (i.e. before pharyngula stage) were designated as *developing embryos (Dev)* (6). All the diapause  
838 and development stages stage are identical to our previous study (6), except *Pre-Dia* stage which  
839 is a day before the onset of heartbeat. For the South American killifish, we could only obtain one  
840 replicate for *Pre-Dia*, *Dev* and *Dia (1m)* stages each, due to colony loss upon facility restrictions  
841 for the COVID-19 pandemic. For killifish species without diapause (red-striped and lyretail  
842 killifish), we followed the same staging procedure described above to collect embryos at *pre-*  
843 *diapause (Pre-Dia)* stage. Because there is no diapause in these killifish, development embryos  
844 were taken as 1 day after the onset of heartbeat to match to the *Dev* stage in the African turquoise  
845 killifish.

846  
847 **Embryo sample collection.** For each stage in each species, roughly 8-30 embryos were carefully  
848 dissected in ice-cold PBS using biological-grade tweezers (Electron Microscopy Sciences, 72700-  
849 D) to carefully remove the chorion, the enveloping layer, and the yolk without damaging the  
850 embryo body. Freshly dissected embryos were then quickly rinsed with ice-cold PBS, and all the  
851 PBS was carefully removed. Embryo bodies were then snap-frozen in liquid nitrogen and stored  
852 at -80°C. We used 8-10 snap-frozen embryos for RNA-seq and ATAC-seq and 25-30 embryos for  
853 lipidomics (see below). The details of all samples and stages used are in Data File S1.

854

### 855 3. RNA-seq library preparation and analysis

856  
857 To profile gene expression at pre-diapause stages in the African turquoise, red-striped and  
858 lyretail killifish, we constructed RNA-seq libraries (Data File S1, GSE185815,  
859 <https://www.ncbi.nlm.nih.gov/geo/query/acc.cgi?acc=GSE185815>). Snap frozen embryos at -  
860 80°C were thawed on ice for 1 minute and washed with 200µl ice-cold PBS. The embryos were

861 then dissociated and homogenized with ~25 Zirconia/Silicon 0.5mm glass beads (RPI, Research  
862 Products International Corp, 9834) using FastPrep® -24 homogenizer (MB Biomedicals,  
863 116004500) for 20 seconds, followed by centrifugation (17000g for 3 minutes). After  
864 centrifugation, 10.5µl of the supernatant was used as input to the SMART-Seq® v4 Ultra® Low  
865 Input RNA Kit (Takara, 634890) for the cDNA synthesis followed by amplification with 12 cDNA  
866 amplification cycles. Amplified cDNA was validated with Agilent 2100 Bioanalyzer using  
867 Agilent's High Sensitivity DNA Kit (Agilent, Cat. No. 5067-4626). The DNA libraries were then  
868 generated using the Nextera XT DNA Library Prep Kit (Illumina, FC-131-1096). Library quality  
869 and concentration were assessed by the Agilent 2100 Bioanalyzer and Agilent's High Sensitivity  
870 DNA Kit (Agilent Technologies, Cat. No. 5067-4626), followed by high throughput sequencing  
871 on Illumina HiSeq platform with 2 x 150bp paired end reads.

872 In addition, we also used available African turquoise killifish (6), South American killifish  
873 (9, 64), medaka (21) and zebrafish (21, 94) embryo RNA-seq data for our analysis (Data File S1),  
874 and processed them using the same pipeline described below. For medaka and zebrafish, we used  
875 mid-somitogenesis stages for our analysis that are expected to be the closest across vertebrates  
876 (21) (Data File S1).

877

878 **RNA-seq data analysis.** We first trimmed the adaptors from raw sequencing FastQ files using  
879 Trim Galore (version 0.4.5) ([http://www.bioinformatics.babraham.ac.uk/projects/trim\\_galore/](http://www.bioinformatics.babraham.ac.uk/projects/trim_galore/))  
880 followed by read quality assessment using FastQC (version 0.11.9,  
881 <https://www.bioinformatics.babraham.ac.uk/projects/fastqc/>) and MultiQC (version 1.8) (95).  
882 Adaptor trimmed files were aligned to the respective genomes (Table S1) using STAR (version  
883 2.7.1a) (96). No reference genome is available for the red-striped killifish, so the reads from red-  
884 striped killifish RNA-seq libraries were aligned to the genome of its close relative, lyretail killifish.  
885 Identification of accurate gene expression values for paralogs can be challenging if the reads align  
886 to both the genes in the pair equally well. Therefore, we excluded all the reads that mapped to  
887 multiple locations in the genome, and only kept reads that align uniquely to a single genomic locus  
888 with samtools (version 1.5) using “*samtools view -q255*” command. Read counts were then  
889 assessed using featureCounts function in Subread package (version 2.0.1) (97). Raw gene  
890 expression values were then normalized using DEseq2 (version 1.30.1) (87). Because different



891 RNA-seq datasets were generated separately, we performed separate normalization for each of the  
892 individual analyses.

893

#### 894 **4. ATAC-seq library preparation and analysis**

895

896 To identify diapause-specific regulatory regions in the genome of African turquoise killifish and  
897 how these have evolved, we performed the Assay of Transposase Accessible Chromatin followed  
898 by high throughput sequencing (ATAC-seq) (20, 98) in the embryos of multiple species. ATAC-  
899 seq is an unbiased and sensitive assay of genome-wide accessible chromatin landscape that  
900 requires very low input material. We performed ATAC-seq on embryos collected from five  
901 different killifish species with and without diapause, and at different stages of development and  
902 diapause (Data File S1, GSE185816,

903 <https://www.ncbi.nlm.nih.gov/geo/query/acc.cgi?acc=GSE185816>). To generate nuclei-  
904 suspension for ATAC-seq libraries, snap frozen embryo samples (~10 embryos per sample) were  
905 thawed for 1 minute and resuspended at 4°C in 200µl EZ-lysis buffer (Sigma Aldrich No. 3408).  
906 Samples were then transferred to 250µl mini-douncers (DWK (Kimble) 885300-0000) and  
907 dounced 25 times with pestle A and B respectively. After a 2 minute incubation following  
908 douncing, samples were spun at 500g for 5 minutes to precipitate nuclei, and the EZ-lysis  
909 supernatant was removed. Nuclei were then resuspended in 250µl PBS (ThermoFisher No.  
910 AM9624) and an aliquot of 5µl of nuclei was incubated with 5µl of 0.4% trypan blue stain  
911 (ThermoFisher No. 15250061) for counting the total intact nuclei counts.

912 Samples of ~25,000 nuclei were then suspended in a Tn5 transposition mix (65µl of  
913 tagmentation DNA buffer (Illumina No. 20034197), 63µl of nuclease-free water, and 2.5µl of  
914 tagmentation DNA enzyme I (e.g Tn5 transposase) (Illumina No. 20034197) for 20 minutes at  
915 37°C. Following incubation, the mix was purified using the Qiagen mini-elute kit (Qiagen No.  
916 28206) to isolate tagmented DNA. PCR amplification and subsequent qPCR monitoring was  
917 performed as described in the original ATAC-seq protocol (~14-18 cycles of PCR) (20). Amplified  
918 DNA from the PCR reaction was purified using the Qiagen mini-elute kit (Qiagen No. 28206), as  
919 recommended by the manufacturer. Samples were subsequently pooled and sequenced using next-  
920 generation short-read sequencing on an Illumina Nextseq 550 (Illumina No. PE-410-1001) with  
921 75bp paired-end reads.

922  
923 **ATAC-seq data analysis.** To process ATAC-seq, we first removed adaptors from FastQ files  
924 using TrimGalore (version 0.4.1)  
925 ([http://www.bioinformatics.babraham.ac.uk/projects/trim\\_galore/](http://www.bioinformatics.babraham.ac.uk/projects/trim_galore/)), followed by read quality  
926 assessment with FastQC (version 0.11.9,  
927 <https://www.bioinformatics.babraham.ac.uk/projects/fastqc/>) and MultiQC (version 1.8) (95).  
928 Reads were then aligned to their respective reference genomes (Table S1) using BowTie2 (version  
929 2.2.5) (99) with “*--very-sensitive*” option. No reference genome is available for the red-striped  
930 killifish, so the reads from red-striped killifish ATAC-seq libraries were aligned to the genome of  
931 the closest sequenced species, lyretail killifish. Duplicates were marked using Picard (version  
932 2.22.1) (<https://github.com/broadinstitute/picard>). Duplicates, multimapping reads (MAPQ < 20),  
933 unmapped and mate-unmapped reads (only one read of the pair mapped), not primary alignments,  
934 and reads failing platform were then removed using SAMtools (version 1.5) (100). Because the  
935 Tn5 transposase binds as a dimer and inserts two adaptors separated by 9bp, all aligned read  
936 positions on + strand were shifted by +4bp, and all reads aligning to the – strand were shifted by  
937 –5bp, using alignmentSieve in deepTools (version 3.2.1) (20, 101). We called peaks using MACS2  
938 (version 2.1.1.20160309) (102, 103) using different effective genome size for each species (e.g.,  
939 genome size after removal of gaps represented by Ns).

940 Library quality was assessed using metrics recommended by ENCODE consortium  
941 (<https://www.encodeproject.org/atac-seq/>) including fragment length distribution to assess  
942 nucleosome bending patterns and enrichment of ATAC-seq peaks at transcription start sites. We  
943 observed the nucleosome bending pattern expected in ATAC-seq data in our libraries and there  
944 was a significant enrichment of ATAC-seq peaks at transcription start sites as expected (fig. S8).  
945 Therefore, except for a 1 month diapause sample for South American killifish which also had a  
946 low alignment rate of 37%, all the libraries were of high quality. Because of a single replicate and  
947 lower alignment rate of South American killifish samples (especially 1 month diapause sample),  
948 we only used South American killifish for Principal Component Analysis and internal comparison.  
949 We excluded the South American killifish samples from our genome-wide conservation analysis  
950 across species.

951 ATAC-seq data from medaka and zebrafish for corresponding development stages were  
952 obtained from Marlétaz et al. (21) (Data File S1) and processed using the same pipeline described

953 above. We used development stage 19 and 25 in medaka and 8-somites and 48 hours post  
954 fertilization in zebrafish, which are expected to correspond to pre-diapause and development in  
955 African turquoise killifish respectively. These were used for chromatin accessibility conservation  
956 analysis presented in Figs. 3 and 4.

957

958 **Identification of diapause specific ATAC-seq peaks.** To identify ATAC-seq peaks that are  
959 specific to diapause in the African turquoise killifish genome, we performed a differential peak  
960 accessibility analysis pairwise between the two developmental conditions (pre-diapause and non-  
961 diapause) and the two diapause conditions (diapause at 6 days and 1 month time points) using  
962 DiffBind (version 2.16.2) (104, 105). We used both DESeq2 (87) and edgeR (106) algorithms  
963 implemented in DiffBind for differential accessibility analysis. Diapause specific peaks were then  
964 identified as the peaks that were significantly up (chromatin more open) in any of the two diapause  
965 conditions with either DESeq2 or edgeR, but do not significantly change (up or down) between  
966 the two development conditions with both DESeq2 and edgeR. This led to 6,490 chromatin peaks  
967 genome-wide in African turquoise killifish that are significantly up in diapause but do not change  
968 during development (fig. S7A, Data File S3). Peaks were assigned to their nearest genes using  
969 ChIPseeker (version 1.28.3) (107), to identify 1,880 diapause specific peaks at specialized paralogs  
970 (Data File S3). Peak annotation with the genomic properties was also performed using ChIPseeker  
971 (fig. S7B). These peaks at specialized paralogs were used for motif enrichment and peak  
972 conservation analyses presented in Figs. 3 and 4.

973

## 974 **5. Multiple whole-genome alignment**

975

976 To integrate ATAC-seq and RNA-seq datasets across species, we performed a 5-way multiple  
977 whole-genome alignment with African turquoise killifish (*Nfur: Nothobranchius furzeri*), lyretail  
978 killifish (*Aaus: Aphyosemion australe*), South American killifish (*Alim: Austrofundulus limnaeus*),  
979 medaka (*Olat: Oryzias latipes*) and zebrafish (*Drer: Danio rerio*) (Table S1), using African  
980 turquoise killifish as the reference genome. For red-striped killifish (*Aphyosemion striatum*),  
981 genome of the closest sequenced species lyretail killifish was used for integrative analysis. For  
982 genomes with chromosome level assemblies, we discarded scaffolds not placed on chromosomes.  
983 First, we performed pairwise alignments between African turquoise killifish and each of the four  
984 other fish genomes using LASTZ (108) (parameters: --gap=400,30 --gappedthresh=3000 --

985 ydrop=6400 --inner=2000 --hsptresh=1500 --masking=50 --notransition --step=20 --  
986 scores=HoxD55.q). Subsequent chaining and netting were performed using the suite of UCSC  
987 genome browser utilities (109). The percentage of aligned African turquoise genome to each of  
988 the other fish species decreased based on the distance to the last common ancestor as expected  
989 (110) with 61.1%, 47.8%, 23.2%, 20.1% of the African turquoise killifish genome aligning to the  
990 lyretail killifish, South American killifish, medaka and zebrafish genomes respectively in a pair-  
991 wise manner.

992 These pairwise alignments were then merged using the multi-alignment tool Multic/TBA  
993 (111), using the command `<tba + E=Nfur (((Nfur Aaus) Alim) Olat) Drer ./pairwise_dir/>` to  
994 obtain a single, 5-way, multiple whole-genome alignment using the African turquoise killifish  
995 genome as the reference (specified by `E=Nfur`). The resulting multiple-whole genome alignment  
996 covered ~75.3% of the African turquoise killifish genome. Coverage of each of the aligned fish  
997 genome in the multi-alignment also diminished as time to the last common ancestor increased with  
998 62.7%, 85.9%, 14.2%, and 23.7% of the genome being covered for lyretail killifish, South  
999 American killifish, medaka, and zebrafish genomes respectively.

1000 To assess the quality of our genome alignment, we compared the length of aligned  
1001 sequence blocks in multi-genome alignment with that of teleost fish 8-way multi-genome  
1002 alignments available from the UCSC genome browser and generated using a similar approach  
1003 (112) (<https://hgdownload.soe.ucsc.edu/goldenPath/danRer7/multiz8way/>). We found that the  
1004 aligned block lengths in both our and 8-way multi-genome alignment from UCSC were  
1005 comparable. Most of the aligned blocks were either 10-99bp long (53% our vs 38.7% UCSC-fish)  
1006 or 100-999bp long (33% our vs 26.5% 8-way alignment from UCSC) in both the alignments.  
1007 Importantly, a vast majority of our ATAC-seq peaks (98.35% of chromosomal peaks) fall in the  
1008 regions that are covered in our multi-genome alignment.

1009

## 1010 **6. Integrating ATAC-seq peaks across species**

1011

1012 The 5-way multiple whole-genome alignment was used to compare ATAC-seq data across species.  
1013 Bed files for each ATAC-seq library were cross-referenced to the alignment and the coordinates  
1014 of ATAC-seq peaks for all species were converted to African turquoise killifish genome  
1015 coordinates. During this process, peaks were tagged as “conserved” at three levels of stringency:  
1016 relaxed (any base pair overlap between peaks), strict (25% of the African turquoise killifish peak

1017 must be covered by aligned peak region in other species), and very strict (50% of the African  
1018 turquoise killifish peak must be covered by the aligned peak in other species). The differences in  
1019 peak conservation between relaxed and strict definitions was minimal (fig. S11). Thus, subsequent  
1020 analysis was performed with the relaxed peak set. During coordinated conversion, some peaks for  
1021 species other than African turquoise killifish became split between two or more locations in the  
1022 African turquoise killifish genome. We also included these split location peaks in our analyses.  
1023 However, split location peaks represent only a minority of recovered peaks (5.2%) and are unlikely  
1024 to influence our analyses.

1025         With this finalized peak set, we then categorized each peak in African turquoise killifish  
1026 and its underlying sequence into one of three conservation categories: *ancient/very ancient*, *recent*,  
1027 *and very recent*. 1) Peaks considered *very recent* had only a peak in the African turquoise killifish  
1028 (likely originated after divergence from killifish species without diapause at < 17.79 MY) (14).  
1029 2) Peaks considered *recent* had overlapping peaks in African turquoise killifish and at least one  
1030 other African killifish (i.e. lyretail killifish or red-striped killifish), but not in outgroups (medaka  
1031 and zebrafish; likely originated between 17.79- 93.2 MY) (14, 82). 3) Peaks considered  
1032 *ancient/very ancient* had overlapping peaks in African turquoise killifish, at least one other African  
1033 killifish (i.e. lyretail killifish or red-striped killifish), and at least one outgroup fish (i.e. medaka or  
1034 zebrafish; likely originated > 93.2 MY) (82) (Data File S3). To avoid confounding peaks within  
1035 our *very recent* category, peaks present in the African turquoise killifish, absent in other African  
1036 killifish, yet present in either zebrafish or medaka were subsequently added to the *ancient/very*  
1037 *ancient* category despite being just outside of the above parameters. The same criteria were used  
1038 to define sequence conservation. However, instead of requiring accessible-chromatin overlap,  
1039 sequences were evaluated for having an aligned orthologous region in each species.

1040         To visualize these peaks across species, we used the Integrative Genomics Viewer (IGV)  
1041 (113). For each species, RPKM-normalized read counts were used either directly (paralog  
1042 displays) or summed across replicates and across developmental/diapause stages (for single  
1043 displays) to create single coverage tracks for fish without diapause and two tracks (one diapause,  
1044 one development) for fish with diapause. Tracks from each species were then anchored to each  
1045 other via a single conserved base in the multiple-whole-genome-alignment and extended to the  
1046 exact same window size in all species. The anchor point for each peak region was chosen based  
1047 on its proximity to the summit of the peak in the African turquoise killifish. Track height for each

1048 species was set automatically by IGV using either the height of the peak of interest, or, in species  
1049 without a conserved peak, to the height of the tallest peak within 40kb of the anchoring base pair.  
1050 These visualizations illustrate the conservation and specialization states described above.

1051 These analyses revealed that for the majority of peaks, the genome sequences under  
1052 chromatin accessible peaks are ‘alignable’ (i.e. conserved enough to establish orthology at the  
1053 genome-wide level), but chromatin accessibility at those regions evolved very recently and  
1054 exclusively in the African turquoise killifish. This pattern was consistent for genome-wide  
1055 chromatin (fig. S10A) and specifically among diapause-accessible peaks at very ancient paralogs  
1056 previously identified in Fig. 1. The sequence conservation is also strongest at coding sequence  
1057 (exons) and decays as expected across promoters, UTRs, introns, and intergenic regions (fig.  
1058 S10B).

1059

## 1060 **7. Principal Component Analysis (PCA) on ATAC-seq**

1061

1062 To explore the global relationships between killifish ATAC-seq samples, we performed principal  
1063 component analysis (PCA) using ATAC-seq peak intensities (normalized aligned read counts for  
1064 each peak). To this end, we first generated peak intensity matrices for each of the following  
1065 comparisons: 1) for the African turquoise killifish diapause and development samples (Fig. 3B,  
1066 left panel); 2) for all killifish species (African turquoise killifish, South American killifish, lyretail  
1067 killifish and red-striped killifish, Fig. 3B, middle panel); 3) killifish with diapause (African  
1068 turquoise killifish and South American killifish, Fig. 3B, right panel). For each comparison, the  
1069 peak matrix contained VST-normalized peaks intensities for all consensus peaks detected in all the  
1070 samples in that comparison. Cross-species comparison only included the peak(s) conserved in all  
1071 samples. The total peaks used for PCA were 60,359 for the African turquoise killifish, 1,293 for  
1072 all killifish, and 3,721 for killifish with diapause. PCA plots were done using autoplot command  
1073 in ggfortify (version 0.4.11) package in R (version 3.6.2).

1074

## 1075 **8. Motif enrichment and conservation analysis**

1076

1077 HOMER (version 4.10), was used for transcription factor binding motif enrichment analysis (24),  
1078 using the ATAC-seq peaks that are significantly up in diapause and were in proximity to the  
1079 diapause specific paralogs for the African turquoise killifish and their orthologous conserved peaks

1080 in other species (see below). Genomes of all the species were added to HOMER using  
1081 “*loadGenome.pl*” utility with the genome fasta and GFF files as input (Table S1). We then used  
1082 the genomic coordinates from the bed file for the diapause specific ATAC-seq peaks at paralogs as  
1083 input to “*findMotifsGenome.pl*” and specified vertebrate motifs by “*-mset vertebrates*”. Known  
1084 motifs in “*knownResults.txt*” generated by the HOMER output was used for all the analyses. To  
1085 remove redundancy in motifs, we performed a motif clustering using tomtom utility in the MEME  
1086 suit (version 5.3.0) (114, 115) using the following parameters: *-thresh 1e-5 -evaluate -min-overlap*  
1087 *6*. The resulting clusters were manually curated, and motifs were assigned to the genes coding for  
1088 the transcription factors.

1089

1090 **Identification of conserved transcription factor binding motifs across species.** To assess the  
1091 evolution and conservation of African turquoise killifish diapause-specific transcription factor  
1092 binding motifs at specialized paralogs in other species, we extracted sequences of these motifs  
1093 from African turquoise killifish and the corresponding aligned sequences in other species from our  
1094 5-way multiple whole-genome alignment. We observed that a vast majority of transcription factor  
1095 binding motifs that are enriched in ATAC-seq peaks up in diapause at specialized paralogs in the  
1096 African turquoise killifish are aligned in other species with motif-like sequences (i.e. sequences  
1097 similar to the canonical motifs). To assess if these motif-like sequences are likely to be bound by  
1098 their respective transcription factors, we subjected motif or motif-like sequences to a binding  
1099 likelihood calculation identical to that used by HOMER (24). We then determined if motif-like  
1100 sequences in species other than African turquoise killifish met the log odds detection threshold  
1101 (defined as the  $\log(X_1/0.25) + \log(X_2/0.25) + \dots + \log(X_n/0.25)$  where  $X$  is the probability of a given  
1102 base being present at a given location in a given motif) computed by HOMER (24) during motif  
1103 enrichment, which is used to determine likelihood of transcription factor bound vs. unbound sites.  
1104 We also excluded motif sites in peaks where an identical motif was found near the aligned region  
1105 in another species. This allowed us to detect cases where the sequence directly aligned to a motif  
1106 is not conserved, but the motif is present nearby and possibly providing similar regulatory  
1107 potential.

1108 These analyses revealed that a very low number of motif-like sequences in other species are  
1109 expected to bind the transcription factor at that position and can be considered as conserved  
1110 transcription factor binding sites across species (4.77% on average). Thus, the vast majority of

1111 these motif-like sequences were likely used as ‘substrates’ during evolution for mutation and  
1112 selection of canonical motif sequences for binding of transcription factors (Fig. 4, E and F, and  
1113 fig. S12).

1114  
1115 **Differences between singletons and paralogs.** To assess the differences between singleton genes  
1116 (genes with no known paralog) and paralogs, we first identified genes that were unambiguously  
1117 identified as paralogs or singletons in all the four paralog identification pipelines (see above). This  
1118 led to 4,009 singleton genes and 10,069 genes with at least one paralog in the African turquoise  
1119 killifish genome. We observed that singletons and paralogs both were equally likely to be  
1120 upregulated in diapause using RNA-seq data compared to their genomic average (fig. S16A).  
1121 However, there were differences in the regulatory motif landscape at specialized paralogs and  
1122 singleton genes. Although several motifs such as REST, FOXO3 and PPARC etc. were enriched  
1123 at both singletons and paralogs, the majority of the motifs were only enriched either at paralogs or  
1124 at singletons (fig. S16B). For example, some transcription factor binding motifs such as TEAD2,  
1125 FOXA2, JUNB etc. were only enriched at paralogs while others such as MYC, RUNX2, ETS1 etc.  
1126 were only enriched at singletons (fig. S16B). This observation suggests that in the African  
1127 turquoise killifish, the diapause regulatory landscape is remodeled genome-wide, but there are  
1128 differences in the regulatory repertoire of singletons and paralogs.

1129  
1130 **Conservations of motifs in alignment-independent manner.** To test that our results are not  
1131 affected by multiple whole-genome alignment and our criteria to establish homology in non-  
1132 coding regions, we also used another orthogonal approach to identify if diapause specific motifs  
1133 at paralogs in African turquoise killifish were conserved in other species. To this end, we compared  
1134 diapause specific ATAC-seq peaks at diapause-specialized paralogs in the African turquoise  
1135 killifish to the corresponding peaks at their ortholog genes in other species in a genome-alignment  
1136 independent manner. To establish homology independent of genome alignment, we only focused  
1137 on ATAC-seq peaks at promoters of the ortholog genes (identified using protein sequences) in  
1138 African turquoise killifish with diapause and in lyretail and red-striped killifish without diapause  
1139 in a pairwise manner, followed by motif enrichment analysis in the respective genome. Although  
1140 this excludes many potential distal enhancer elements, the results were similar to those using our



1141 multi-genome alignment (see above), and corroborate that diapause-specific transcription factor  
1142 binding motifs are only present in the African turquoise killifish genome (fig. S17).

1143

## 1144 **9. Transposable element identification and analysis**

1145

1146 To evaluate the contribution of Transposable Elements (TEs) for the evolution of diapause, we  
1147 first developed a comprehensive map of abundance and genomic location of all TEs in the  
1148 aforementioned teleost fish species used to construct the genome multi-alignment. We employed  
1149 RepeatMasker (version 4.0) (116) to identify repetitive sequences using the *Teleosti* suite of know  
1150 repeat elements `<Repeatmasker -a -s -species 'Teleostei' Input.fa>` and `<processRepeats -xsmall`  
1151 `RMoutput.fa.gz>` allowing for a standardized repetitive element set across species. We detected  
1152 similar abundances of TE classes and families as previously reported by various sources (117). We  
1153 then identified overlap between all ATAC-seq peak coordinates and TE coordinates in African  
1154 turquoise killifish. We evaluated TE enrichment at ATAC-seq peaks up specifically in diapause as  
1155 compared to: 1) 'Genome': TE representation genome-wide (Fig 4H, upper panel), 2) 'Chromatin':  
1156 TE representation within all ATAC-seq peaks (Fig 4H, middle panel), 3) 'Control loci': size-  
1157 matched regions 10kb downstream of ATAC-seq up specifically in diapause (Fig 4H, lower  
1158 panel), using a binomial test (Mutational Patterns Package version 3.2.0) (118). Several TE  
1159 families showed enrichment specific to differentially accessible chromatin sites specific to  
1160 diapause, such as Crypton-A (DNA), Zisupton (DNA), RTE-X (LINE), and tRNA-Mermaid  
1161 (SINE) (Fig 4H).

1162

We then evaluated the overlap between these TE instances and enriched transcription factor  
1163 binding motifs detected in our analysis above. These chromatin-accessible TE-embedded motifs  
1164 were also evaluated for conservation across species by assessing whether 1) the TE is present at  
1165 aligned location in the genome alignment and contains the transcription factor binding motif  
1166 sequence, 2) the TE is present at the aligned location in other species, but lacks the transcription  
1167 factor binding motif sequence, 3) the TE is absent at the aligned location, but a transcription factor  
1168 binding motif still exist at this location in the alignment, or 4) both the TE and transcription factor  
1169 binding motif binding site are absent at the aligned location in the other species. This analysis  
1170 revealed that a majority of TE sites are exclusive to African turquoise killifish, as can be expected  
1171 given the rapid rate at which the TE landscape changes (119-121) and given the recent TE  
1172 expansion in the African turquoise killifish genome (26) (Fig. 4I and fig. S14).

## 10. Positive selection analysis

**Positive selection of regulatory regions.** To evaluate whether diapause-accessible chromatin peaks show any signature of positive selection, we used a recently developed method to detect positive selection at transcription factor binding sites and accessible chromatin (25, 122). We scanned for signature of positive selection at the genomic DNA underlying ATAC-seq peaks with respect to: 1) ancestor of all killifish species in our analysis ('killifish ancestor'); and 2) ancestor of killifish and medaka ('pre-medaka ancestor') (fig. S13A). We first inferred ancestral sequences for these two nodes within the teleost lineage using the PAML package (version 4.8) (123). Alignment blocks from our 5-way fish multiple whole-genome alignment that were at least 50bp long and covered at least 50% of the ATAC-seq peaks were used for the ancestor generation and positive selection analysis. We excluded ATAC-seq peaks that were in exons to focus on regulatory elements. The ancestral sequences and the African turquoise killifish sequences were used to generate Support Vector Machine (SVM) kmer weights and positive selection was detected using hightail test as recommended (25, 122) (<https://github.com/ljljolinq1010/A-robust-method-for-detecting-positive-selection-on-regulatory-sequences/>). The Benjamini-Hochberg procedure was used for multiple hypothesis correction, and ATAC-seq peaks with FDR < 0.1 for either pre-killifish or pre-medaka ancestors were considered to be under positive selection (see Data File S3).

In total, we detected 3,836 and 3,928 ATAC-seq peaks with signature of positive selection using the 'killifish ancestor' and 'pre-medaka ancestor' inferred sequences respectively, with both having a strong overlap of 3,370 (76.7%) (fig. S13B). We used the union of the two groups for the downstream analysis. A total of 172 diapause-specific ATAC-seq peaks at specialized paralogs showed signature of positive selection (Fig. 4G, Data File S3). These were enriched for several of the transcription factor binding motifs detected in our previous analysis, including REST, FOXO3 and PPARs (Fig. 4G and fig. S13C). The functional enrichment of ATAC-seq peaks also included several functions related to lipid metabolism (Data File S6). These results suggest that at least a portion of genomic loci underlying diapause-specific ATAC-seq peaks may have evolved due to positive selective pressure at these loci.

**Positive selection on protein-coding gene sequences.** The protein-coding genes under positive selection in African turquoise killifish were identified using phylogenetic analysis involving 19 fish species with and without diapause as described in Wagner et al. (9). Briefly, protein sequences

1205 were clustered using Proteinortho (version 5.11) (124), followed by filtering of clusters and  
1206 alignment of coding sequences of the filtered clusters using PRANK v.140603 (125). The resulting  
1207 codon aware alignments were filtered with GUIDANCE v2.0 (126) to remove low quality regions.  
1208 Proteins and individual amino acids under positive selection were then identified in the ancestor  
1209 of African killifish with diapause (in the branch leading to the African killifish genus  
1210 nothobranchius after separation from the African killifish without diapause *A. striatum*) using the  
1211 branch-site model in CODEML implemented in the Phylogenetic Analysis by Maximum  
1212 Likelihood package (PAML) (123). This ancestral branch co-insides with the time period at which  
1213 evolution of diapause likely occurred in African turquoise killifish (~18 MY ago). Proteins with a  
1214 *P*-value of the branch-site test less than 0.05 (without any FDR correction to maximize the number  
1215 of proteins with potential signals of selection) were then filtered. This led to a list of 213 protein-  
1216 coding genes under positive selection in the ancestor of killifish species with diapause after  
1217 divergence from killifish species without diapause and outgroup fish species (see Data File S4).

1218

## 1219 **11. Functional enrichment analysis**

1220

1221 To perform functional enrichment analysis for diapause specific African turquoise killifish ATAC-  
1222 seq peaks or upregulated genes in diapause, we used Gene Ontology (GO) analysis using GOstats  
1223 package (version 2.56.0) (127). GO terms from human and zebrafish were assigned to their killifish  
1224 orthologs (best hit protein with BLASTp E-value >1e-3). For GO enrichment analysis using  
1225 diapause specific ATAC-seq peaks, we used the non-redundant list of genes closest to the peaks  
1226 (Data File S3) with all protein coding genes as background and performed a hypergeometric test  
1227 implemented in GOstats. Similarly, for RNA-seq, we used genes upregulated in diapause (Data  
1228 File S2). GO terms enriched in both diapause RNA-seq and ATAC-seq are in Data File S5, which  
1229 included many GO terms related to lipid metabolism (Fig. 5, A and B, and Data File S5). We also  
1230 performed GO enrichment analysis for the subset of ATAC-seq peaks that show signatures of  
1231 positive selection (see above, Data File S3), and observed that several lipid metabolism related  
1232 functions are enriched in the genes next to the chromatin accessibility regions that have evolved  
1233 under positive selection (Data File S6).

1234 To identify the upstream regulators of genes upregulated during diapause in the African  
1235 turquoise killifish, we used Ingenuity Pathway Analysis (IPA) upstream regulator analysis  
1236 (QIAGEN, March 2021 release) (Data File S7).

## 12. Untargeted lipidomics by LC-MS and analysis

Lipidomics experiments were performed using ~30 embryos for each stage of diapause and development from African turquoise and red-striped killifish (3-4 replicates for each stage) (Fig. 5C) as previously described (128, 129).

Lipids were extracted in a randomized order via biphasic separation with cold methyl tert-butyl ether (MTBE), methanol and water. Briefly, 260µl of methanol and 40µl of water were added to the embryos and vortexed for 20 seconds. A lipid internal standard mixture was spiked in each sample (EquisPLASH LIPIDOMIX, Avanti Polar Lipids (cat #: 330731), and d17-Oleic acid, Cayman chemicals (cat #: 9000432) to control for extraction efficiency, evaluate LC-MS performance and estimate concentrations of individual lipids. Samples were diluted with 1,000µl of MTBE, vortexed for 10 seconds, sonicated for 30 seconds three times in a water bath, and incubated under agitation for 30 minutes at 4°C. After addition of 250µl of water, the samples were vortexed for 1 minute and centrifuged at 14,000g for 5 minutes at 20°C. The upper phase containing the lipids was collected and dried down under nitrogen. The dry extracts were reconstituted with 150µl of 9:1 methanol:toluene.

Lipid extracts were analyzed in a randomized order using an Ultimate 3000 RSLC system coupled with a Q Exactive mass spectrometer (Thermo Fisher Scientific) as previously described (129). Each sample was run twice in positive and negative ionization modes and lipids were separated using an Accucore C30 column 2.1x150mm, 2.6µm (Thermo Fisher Scientific) and mobile phase solvents consisted in 10mM ammonium acetate and 0.1% formic acid in 60/40 acetonitrile/water (A) and 10mM ammonium acetate and 0.1% formic acid in 90/10 isopropanol/acetonitrile (B). The gradient profile used was 30% B for 3min, 30–43% B over 5min, 43–50% B over 1min, 55–90% B over 9min, 90–99% B over 9min and 99% B for 5min. Lipids were eluted from the column at 0.2ml/min, the oven temperature was set at 30°C, and the injection volume was 5µl. Autosampler temperature was set at 15°C to prevent lipid aggregation.

LC-MS peak extraction, alignment, quantification, and annotation was performed using LipidSearch software version 4.2.21 (Thermo Fisher Scientific). Lipids were identified by matching the precursor ion mass to a database and the experimental MS/MS spectra to a spectral library containing theoretical fragmentation spectra. The following lipid ions were used for quantification: [M+H]<sup>+</sup> for ceramides (Cer), (lysophosphatidylcholine) LPC, phosphatidylcholine (PC), monoglycerides (MG) and sphingomyelins (SM); [M-H]<sup>-</sup> for phosphatidylethanolamines

1269 (PE), phosphatidylinositols (PI), phosphatidylserines (PS), phosphatidylglycerols (PG) and  
1270 lysophosphatidylethanolamine (LPE); and  $[M+NH_4]^+$  for cholesterol ester (ChE), diglycerides  
1271 (DG) and triglycerides (TG). To reduce the risk of misidentification, MS/MS spectra from lipids  
1272 of interest were validated as follows: 1) both positive and negative mode MS/MS spectra match  
1273 the expected fragments, 2) the main lipid adduct forms detected in positive and negative modes  
1274 agree with the lipid class identified, 3) the retention time is compatible with the lipid class  
1275 identified and 4) the peak shape is acceptable. The fragmentation pattern of each lipid class was  
1276 experimentally validated using lipid internal standards.

1277         Single-point internal standard calibrations were used to estimate absolute concentrations  
1278 for 431 unique lipids belonging to 14 classes using one internal standard for each lipid class.  
1279 Importantly, we ensured linearity within the range of detected endogenous lipids using serial  
1280 dilutions of internal standards spanning 4 orders of magnitude. Median normalization (excluding  
1281 TG and DG) was employed on lipid molar concentrations to correct for differential quantity of  
1282 starting material. Importantly, we verified that median lipid signal (excluding TG and DG)  
1283 correlated well (Pearson's correlation coefficient = 0.48,  $P = 0.005$ ) with the total protein content  
1284 in each sample as measured by the BCA Protein Assay Kit (Pierce, cat# 23225) from precipitated  
1285 proteins following the biphasic separation, suggesting good sample quality. One development  
1286 (diapause escape) sample had an unexpectedly low protein concentration and thus was discarded.  
1287 Lipid molar concentrations for a given class were calculated by summing individual lipid species  
1288 molar concentrations belonging to that class. Fatty acid composition analysis was performed in  
1289 each lipid class. Fatty acid composition was calculated by taking the ratio of the sum molar  
1290 concentration of a given fatty acid over the sum molar concentration across fatty acids found in  
1291 the lipids of the class. Subsequently, saturated fatty acids (SFA), mono-unsaturated fatty acids  
1292 (MUFA) and poly-unsaturated fatty acids (PUFA) were grouped together for comparative analysis.

1293         Principal Component Analysis (PCA) was performed using all the lipids identified for: 1)  
1294 African turquoise killifish diapause and development samples (Fig. 5D left panel); and 2) African  
1295 turquoise and red-striped killifish pre-diapause samples (Fig. 5D right panel). The total of 431  
1296 filtered and normalized lipid intensities were used for PCA (see below), which were also plotted  
1297 using autoplot function in ggfortify package (version 0.4.11) in R (version 4.0.5).

1298         Discriminant analysis was performed using a Welch's t-test that does not assume equal  
1299 population variances for each lipid among the two diapause (6 days and 1 month) and the two

1300 development conditions (pre-diapause and diapause escape). Lipids that were significantly  
1301 different (Welch's t-test,  $P < 0.05$  after multiple hypothesis correction using Benjamini-Hochberg  
1302 method) between diapause and development but did not significantly change between the two  
1303 development conditions were categorized as diapause specific lipids. These constitute lipids that  
1304 go up or down when embryos enter diapause but do not change among the two development time  
1305 points. This led to 350 diapause specific lipid changes, 80 of which were triglycerides, including  
1306 very long-chain fatty acid triglycerides (Fig. 5, E to G, fig. S15, and Data File S8).

## 1307 SUPPLEMENTARY REFERENCES

- 1308  
1309 81. D. M. Emms, S. Kelly, OrthoFinder: solving fundamental biases in whole genome  
1310 comparisons dramatically improves orthogroup inference accuracy. *Genome Biol* **16**, 157  
1311 (2015).
- 1312 82. A. D. Yates *et al.*, Ensembl 2020. *Nucleic Acids Res* **48**, D682-D688 (2020).
- 1313 83. S. F. Altschul, W. Gish, W. Miller, E. W. Myers, D. J. Lipman, Basic local alignment  
1314 search tool. *J Mol Biol* **215**, 403-410 (1990).
- 1315 84. P. P. Singh *et al.*, On the expansion of "dangerous" gene repertoires by whole-genome  
1316 duplications in early vertebrates. *Cell Rep* **2**, 1387-1398 (2012).
- 1317 85. P. P. Singh, J. Arora, H. Isambert, Identification of Ohnolog Genes Originating from  
1318 Whole Genome Duplication in Early Vertebrates, Based on Synteny Comparison across  
1319 Multiple Genomes. *PLoS Comput Biol* **11**, e1004394 (2015).
- 1320 86. P. P. Singh, H. Isambert, OHNOLOGS v2: a comprehensive resource for the genes retained  
1321 from whole genome duplication in vertebrates. *Nucleic Acids Res* **48**, D724-D730 (2020).
- 1322 87. M. I. Love, W. Huber, S. Anders, Moderated estimation of fold change and dispersion for  
1323 RNA-seq data with DESeq2. *Genome Biol* **15**, 550 (2014).
- 1324 88. P. JE, Husbandry of the annual killifish *Austrofundulus limnaeus* with special emphasis on  
1325 the collection and rearing of embryos. *Environ Biol Fish* **54**, 421-431 (1999).
- 1326 89. M. Polacik, R. Blazek, M. Reichard, Laboratory breeding of the short-lived annual killifish  
1327 *Nothobranchius furzeri*. *Nat Protoc* **11**, 1396-1413 (2016).
- 1328 90. J. Dodzian, S. Kean, J. Seidel, D. R. Valenzano, A Protocol for Laboratory Housing of  
1329 Turquoise Killifish (*Nothobranchius furzeri*). *J Vis Exp*, (2018).
- 1330 91. J. E. Podrabsky *et al.*, Embryonic development of the annual killifish *Austrofundulus*  
1331 *limnaeus*: An emerging model for ecological and evolutionary developmental biology  
1332 research and instruction. *Dev Dyn* **246**, 779-801 (2017).
- 1333 92. J. E. Podrabsky, I. D. Garrett, Z. F. Kohl, Alternative developmental pathways associated  
1334 with diapause regulated by temperature and maternal influences in embryos of the annual  
1335 killifish *Austrofundulus limnaeus*. *J Exp Biol* **213**, 3280-3288 (2010).

1336 93. J. E. Podrabsky, S. C. Hand, The bioenergetics of embryonic diapause in an annual  
1337 killifish, *austrofundulus limnaeus*. *J Exp Biol* **202 (Pt 19)**, 2567-2580 (1999).

1338 94. A. Pauli *et al.*, Systematic identification of long noncoding RNAs expressed during  
1339 zebrafish embryogenesis. *Genome Res* **22**, 577-591 (2012).

1340 95. P. Ewels, M. Magnusson, S. Lundin, M. Kaller, MultiQC: summarize analysis results for  
1341 multiple tools and samples in a single report. *Bioinformatics* **32**, 3047-3048 (2016).

1342 96. A. Dobin *et al.*, STAR: ultrafast universal RNA-seq aligner. *Bioinformatics* **29**, 15-21  
1343 (2013).

1344 97. Y. Liao, G. K. Smyth, W. Shi, featureCounts: an efficient general purpose program for  
1345 assigning sequence reads to genomic features. *Bioinformatics* **30**, 923-930 (2014).

1346 98. C. Doganli, M. Sandoval, S. Thomas, D. Hart, Assay for Transposase-Accessible  
1347 Chromatin with High-Throughput Sequencing (ATAC-Seq) Protocol for Zebrafish  
1348 Embryos. *Methods Mol Biol* **1507**, 59-66 (2017).

1349 99. B. Langmead, S. L. Salzberg, Fast gapped-read alignment with Bowtie 2. *Nat Methods* **9**,  
1350 357-359 (2012).

1351 100. P. Danecek *et al.*, Twelve years of SAMtools and BCFtools. *Gigascience* **10**, (2021).

1352 101. F. Ramirez *et al.*, deepTools2: a next generation web server for deep-sequencing data  
1353 analysis. *Nucleic Acids Res* **44**, W160-165 (2016).

1354 102. T. Liu, Use model-based Analysis of ChIP-Seq (MACS) to analyze short reads generated  
1355 by sequencing protein-DNA interactions in embryonic stem cells. *Methods Mol Biol* **1150**,  
1356 81-95 (2014).

1357 103. Y. Zhang *et al.*, Model-based analysis of ChIP-Seq (MACS). *Genome Biol* **9**, R137 (2008).

1358 104. B. G. Stark R, DiffBind: differential binding analysis of ChIP-Seq peak data.  
1359 <http://bioconductor.org/packages/release/bioc/vignettes/DiffBind/inst/doc/DiffBind.pdf>,  
1360 (2011).

1361 105. C. S. Ross-Innes *et al.*, Differential oestrogen receptor binding is associated with clinical  
1362 outcome in breast cancer. *Nature* **481**, 389-393 (2012).

1363 106. M. D. Robinson, D. J. McCarthy, G. K. Smyth, edgeR: a Bioconductor package for  
1364 differential expression analysis of digital gene expression data. *Bioinformatics* **26**, 139-140  
1365 (2010).

1366 107. G. Yu, L. G. Wang, Q. Y. He, ChIPseeker: an R/Bioconductor package for ChIP peak  
1367 annotation, comparison and visualization. *Bioinformatics* **31**, 2382-2383 (2015).

1368 108. H. R.S., Ph.D. Thesis, Pennsylvania State University, Pennsylvania State University  
1369 (2007).

1370 109. R. M. Kuhn, D. Haussler, W. J. Kent, The UCSC genome browser and associated tools.  
1371 *Brief Bioinform* **14**, 144-161 (2013).

- 1372 110. E. H. Margulies *et al.*, An initial strategy for the systematic identification of functional  
1373 elements in the human genome by low-redundancy comparative sequencing. *Proc Natl*  
1374 *Acad Sci U S A* **102**, 4795-4800 (2005).
- 1375 111. M. Blanchette *et al.*, Aligning multiple genomic sequences with the threaded blockset  
1376 aligner. *Genome Res* **14**, 708-715 (2004).
- 1377 112. W. Miller *et al.*, 28-way vertebrate alignment and conservation track in the UCSC Genome  
1378 Browser. *Genome Res* **17**, 1797-1808 (2007).
- 1379 113. J. T. Robinson *et al.*, Integrative genomics viewer. *Nat Biotechnol* **29**, 24-26 (2011).
- 1380 114. T. L. Bailey *et al.*, MEME SUITE: tools for motif discovery and searching. *Nucleic Acids*  
1381 *Res* **37**, W202-208 (2009).
- 1382 115. S. Gupta, J. A. Stamatoyannopoulos, T. L. Bailey, W. S. Noble, Quantifying similarity  
1383 between motifs. *Genome Biol* **8**, R24 (2007).
- 1384 116. A. F. A. Smit, Hubley, R., Green, P., RepeatMasker Open-4.0.  
1385 <http://www.repeatmasker.org>, (2013-2015).
- 1386 117. B. Gao *et al.*, The contribution of transposable elements to size variations between four  
1387 teleost genomes. *Mob DNA* **7**, 4 (2016).
- 1388 118. F. Blokzijl, R. Janssen, R. van Boxtel, E. Cuppen, MutationalPatterns: comprehensive  
1389 genome-wide analysis of mutational processes. *Genome Med* **10**, 33 (2018).
- 1390 119. F. Shao, M. Han, Z. Peng, Evolution and diversity of transposable elements in fish  
1391 genomes. *Sci Rep* **9**, 15399 (2019).
- 1392 120. C. G. Sotero-Caio, R. N. Platt, 2nd, A. Suh, D. A. Ray, Evolution and Diversity of  
1393 Transposable Elements in Vertebrate Genomes. *Genome Biol Evol* **9**, 161-177 (2017).
- 1394 121. A. Testori *et al.*, The role of Transposable Elements in shaping the combinatorial  
1395 interaction of Transcription Factors. *BMC Genomics* **13**, 400 (2012).
- 1396 122. V. R. R. Jialin L., Khoueiry P., Reddington J.P., Girardot C., Furlong E.E.M., Robinson-  
1397 Rechavi M., The hourglass model of evolutionary conservation during embryogenesis  
1398 extends to developmental enhancers with signatures of positive selection. *bioRxiv*  
1399 <https://doi.org/10.1101/2020.11.02.364505>, (2021).
- 1400 123. Z. Yang, PAML 4: phylogenetic analysis by maximum likelihood. *Mol Biol Evol* **24**, 1586-  
1401 1591 (2007).
- 1402 124. M. Lechner *et al.*, Proteinortho: detection of (co-)orthologs in large-scale analysis. *BMC*  
1403 *Bioinformatics* **12**, 124 (2011).
- 1404 125. A. Loytynoja, Phylogeny-aware alignment with PRANK. *Methods Mol Biol* **1079**, 155-170  
1405 (2014).
- 1406 126. I. Sela, H. Ashkenazy, K. Katoh, T. Pupko, GUIDANCE2: accurate detection of unreliable  
1407 alignment regions accounting for the uncertainty of multiple parameters. *Nucleic Acids Res*  
1408 **43**, W7-14 (2015).



- 1409 127. S. Falcon, R. Gentleman, Using GOSTats to test gene lists for GO term association.  
1410 *Bioinformatics* **23**, 257-258 (2007).
- 1411 128. K. Contrepois *et al.*, Cross-Platform Comparison of Untargeted and Targeted Lipidomics  
1412 Approaches on Aging Mouse Plasma. *Sci Rep* **8**, 17747 (2018).
- 1413 129. A. C. Yang *et al.*, Physiological blood-brain transport is impaired with age by a shift in  
1414 transcytosis. *Nature* **583**, 425-430 (2020).
- 1415 130. K. Ichikawa *et al.*, Centromere evolution and CpG methylation during vertebrate  
1416 speciation. *Nat Commun* **8**, 1833 (2017).
- 1417 131. K. Howe *et al.*, The zebrafish reference genome sequence and its relationship to the human  
1418 genome. *Nature* **496**, 498-503 (2013).

# SUPPLEMENTARY FIGURES

## Figure S1

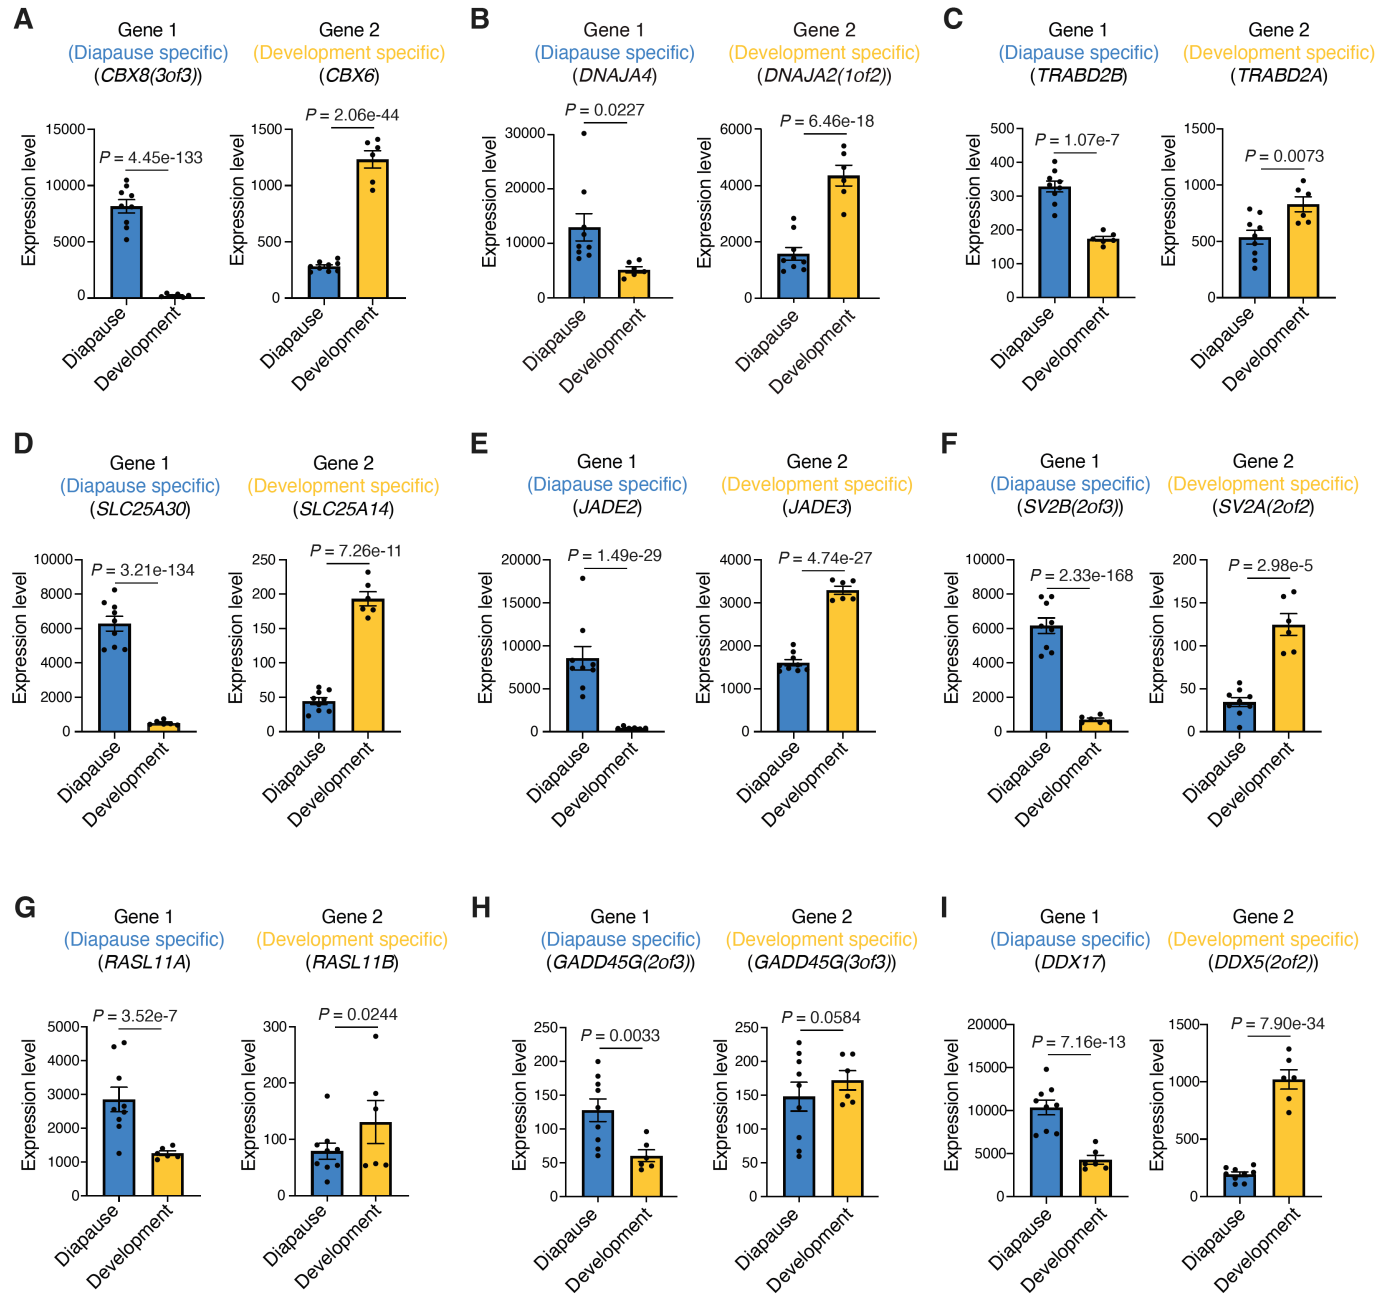

1419 **Figure S1. Additional examples of diapause-specialized paralogs in the African turquoise killifish (A-**  
1420 **I) Examples of paralog gene pairs, with specialized expression of gene 1 in diapause (blue) and gene 2 in**  
1421 **development (yellow) in African turquoise killifish (*Nothobranchius furzeri*). Bars represent mean**  
1422 **expression level (normalized DESeq2 count) across replicates in diapause or development state. Dots show**  
1423 **normalized DESeq2 counts in each replicate. Error bar is standard error of mean (SEM). Corrected *P*-values**  
1424 **(median from pairwise comparisons) from DESeq2 Wald test.**

Figure S2

**A** Identification of African turquoise killifish paralogs and their divergence time using OrthoFinder.  
 Pipeline figure adapted from Orthofinder manual [Emms and Kelly 2019]).

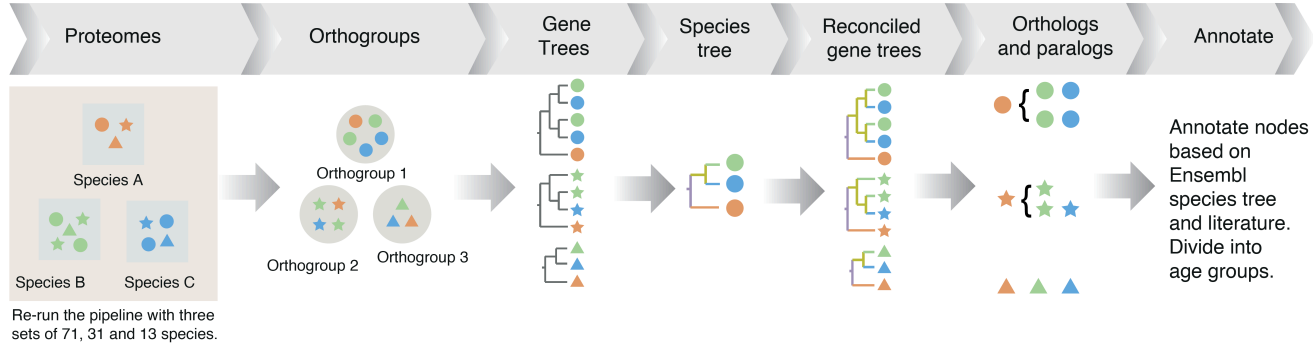

**B** Species tree and duplication nodes for 71 species used for paralog classification

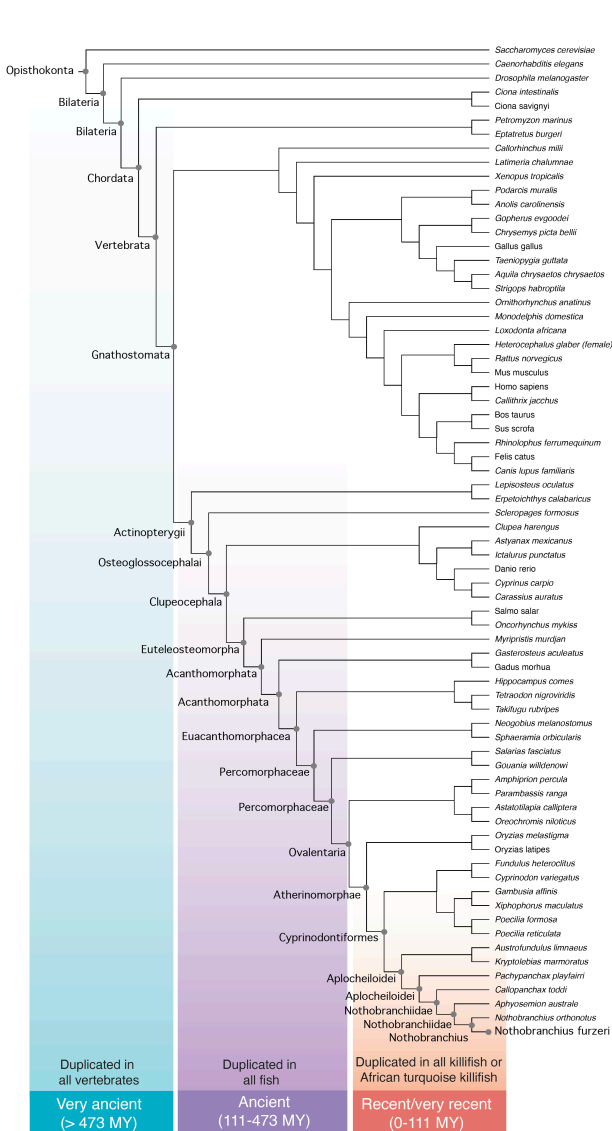

**C** Species tree and duplication nodes for 31 species used for paralog classification

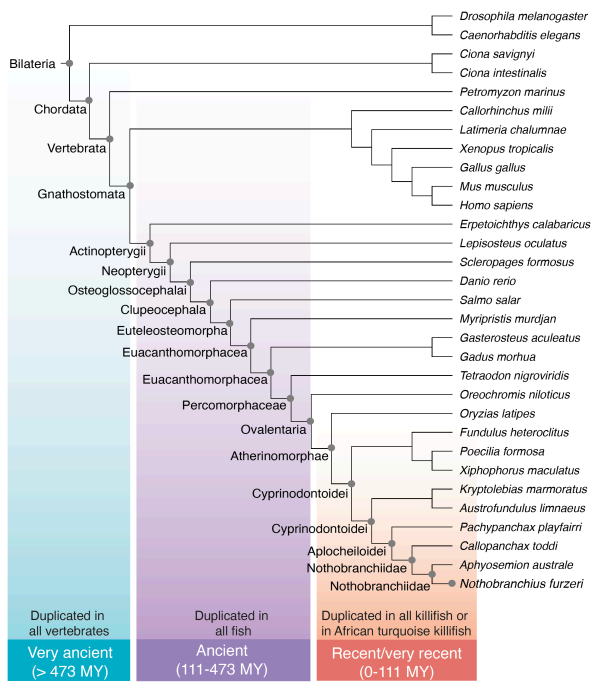

**D** Species tree and duplication nodes for 13 species used for paralog classification

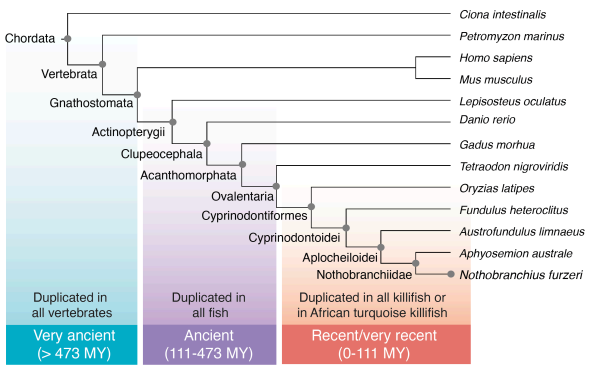

1425 **Figure S2. Identification of paralogs and their duplication timing.** (A) Schematic of pipeline used to  
1426 identify and date the time of duplication of paralogs in the African turquoise killifish as adapted from the  
1427 OrthoFinder manual (34). The proteomes of included species are grouped by protein sequence similarity  
1428 and converted to gene trees. Trees for each orthogroup are then compared and reconciled against the  
1429 established phylogenetic tree and used to build inferred ortholog-paralog groupings. These groups are used  
1430 to identify paralogs and estimate the relative timing of gene duplication. (B) Complete dendrogram of  
1431 included species for binning paralog duplication time into 3 categories based on OrthoFinder pipeline with  
1432 71 species. Divergence time estimates are from species tree in Ensembl. Binned categories are: Genes that  
1433 were duplicated in the common ancestor of all vertebrates or earlier (very ancient, > 473 million years  
1434 [MY]), genes that were duplicated in the common ancestor of all fish (ancient, 111-473 MY), and genes  
1435 that were duplicated in the common ancestor of all killifish or African turquoise killifish exclusively  
1436 (recent/very recent, 0-111 MY). (C) Complete dendrogram of included species for binning paralog  
1437 duplication time into 3 categories based on OrthoFinder pipeline with 31 species. Divergence time estimates  
1438 are from species tree in Ensembl. (D) Complete dendrogram of included species for binning paralog  
1439 duplication time into 3 categories based on OrthoFinder pipeline with 13 species. Divergence time estimates  
1440 are from species tree in Ensembl.

Figure S3

**A** Duplication time of specialized paralogs (ohnologs) duplicated by WGD in the African turquoise killifish

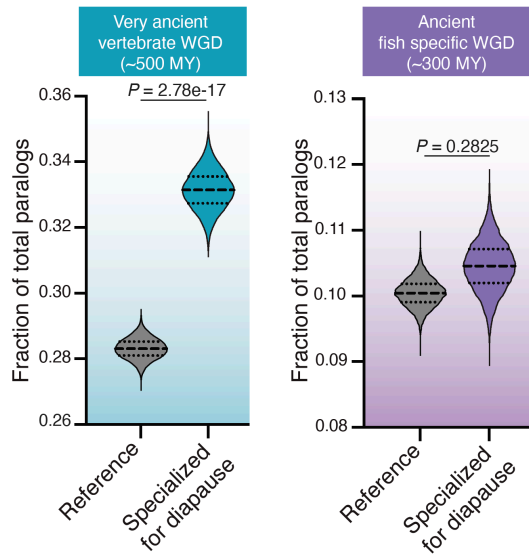

**B** Duplication time of specialized paralogs duplicated by SSD excluding ohnologs in the African turquoise killifish

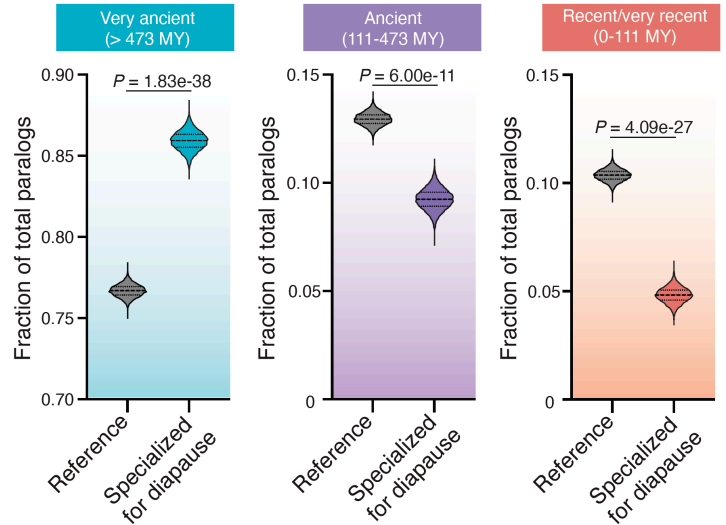

1441 **Figure S3. Specialization of paralogs duplicated by whole genome duplication or small-scale**  
1442 **duplication in the African turquoise killifish.** (A) Fraction of total paralog pairs (ohnologs)  
1443 within either the vertebrate ancestor Whole Genome Duplication (WGD) event (left) or the fish  
1444 ancestor WGD event (right). The enrichment of diapause-specialized paralogs pairs within each  
1445 bin is compared to genome-wide expectation (reference). Violin plots represent distribution of  
1446 observed vs expected specialized paralog fractions generated through 10,000 bootstrapped random  
1447 sampling. Median and quartiles are indicated by dashed lines. Compared to the reference, paralogs  
1448 with specialization in diapause are enriched among genes from the vertebrate ancestral WGD event  
1449 and depleted among genes from the fish ancestral WGD event respectively. *P*-values from Chi-  
1450 square test. (B) Fraction of total paralog pairs within each of the very ancient (left), ancient  
1451 (middle), and recent/very recent (right) binned categories from Small Scale Duplication (SSD),  
1452 after excluding ohnologs. Violin plots represent distribution of observed vs expected specialized  
1453 paralog fractions generated through 10,000 bootstrapped random sampling. Median and quartiles  
1454 are indicated by dashed lines. The enrichment of diapause-specialized paralogs pairs within each  
1455 bin is compared to genome-wide expectation (reference). Compared to the reference, paralogs with  
1456 specialization in diapause are enriched among genes with very ancient SSD duplication times and  
1457 depleted among genes with ancient and recent/very recent SSD duplication times respectively. *P*-  
1458 values from Chi-square test.

Figure S4

**A** Duplication time of specialized paralogs identified by 31 vertebrate species

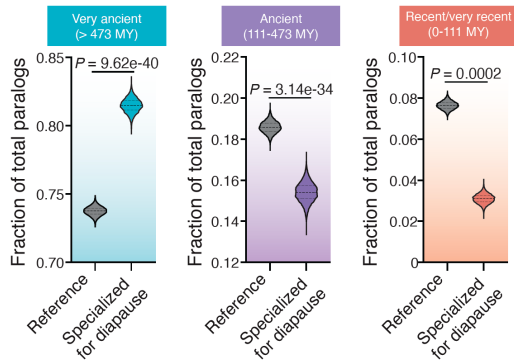

**B** Duplication time of specialized paralogs identified by 13 vertebrate species

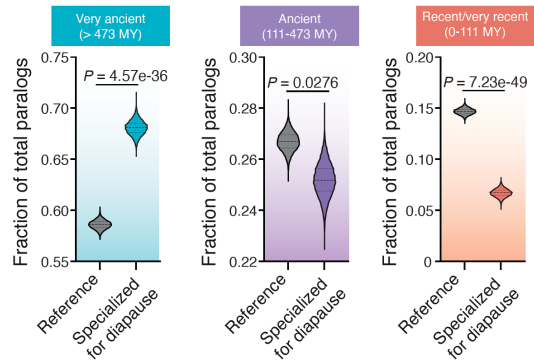

**C** Duplication time of specialized paralogs identified by Ensembl

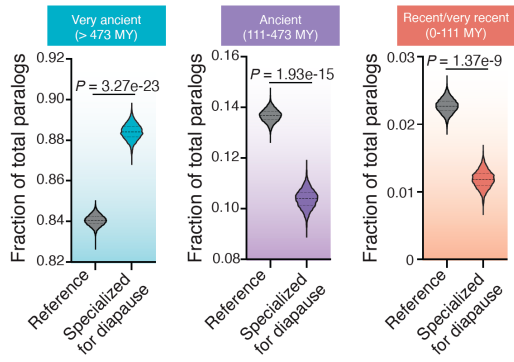

**D** Duplication time of specialized paralogs with only a single duplication event (71 species group)

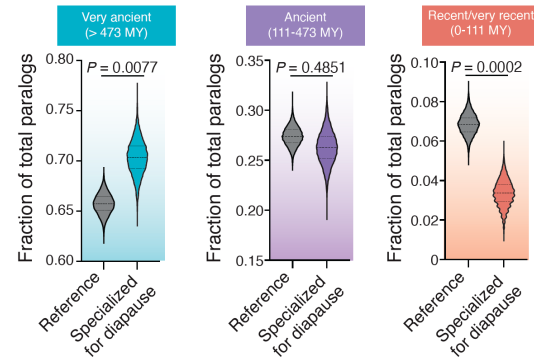

**E** Duplication time of specialized paralogs with a single most similar pair in a family (71 species group)

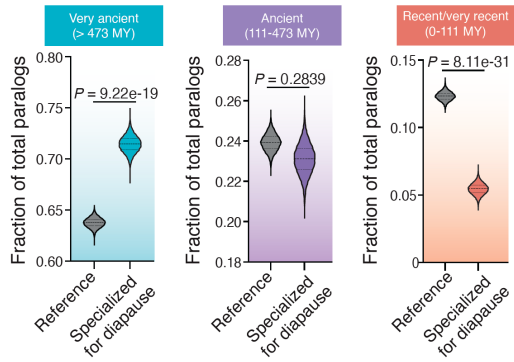

**F** Duplication time of paralogs not specialized in diapause (71 species group)

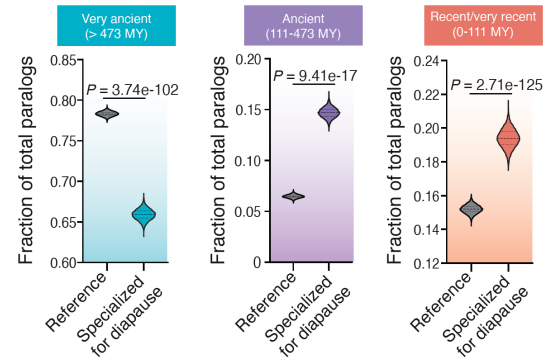

**G** No significant overlap between genes upregulated in diapause and genes that show positive selection at the level of protein sequence

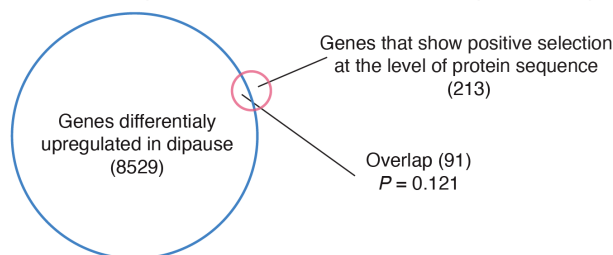



1459 **Figure S4. Specialization of paralogs in the African turquoise killifish with different paralog sources**  
1460 **to assess robustness.** (A) Fraction of total paralog pairs within each of the very ancient (left), ancient  
1461 (middle), and recent/very recent (right) binned categories using 31 rather than 71 species (fig. S2C). The  
1462 enrichment of diapause-specialized paralogs pairs within each bin is compared to genome-wide  
1463 expectation(reference). Violin plots represent distribution of observed vs expected specialized paralog  
1464 fractions generated through 10,000 bootstrapped random sampling. Median and quartiles are indicated by  
1465 dashed lines. Compared to the reference, paralogs with specialization in diapause are enriched among genes  
1466 with very ancient duplication times and depleted among genes with ancient and recent or very recent  
1467 duplication times respectively. *P*-values from Chi-square test. (B) Fraction of total paralog pairs within  
1468 each of the very ancient (left), ancient (middle), and recent/very recent (right) binned categories using 13  
1469 rather than 71 species (fig. S2D). Violin plots represent distribution of observed vs expected specialized  
1470 paralog fractions generated through 10,000 bootstrapped random sampling. Median and quartiles are  
1471 indicated by dashed lines. The enrichment of diapause-specialized paralogs pairs within each bin is  
1472 compared to genome-wide expectation (reference). Compared to the reference, paralogs with specialization  
1473 in diapause are enriched among genes with very ancient duplication times and depleted among genes with  
1474 ancient and recent or very recent duplication times respectively. *P*-values from Chi-square test. (C) Fraction  
1475 of total paralog pairs within each of the very ancient (left), ancient (middle), and recent or very recent (right)  
1476 binned categories using independent duplication time estimates from Ensembl rather than our pipeline (see  
1477 methods). Violin plots represent distribution of observed vs expected specialized paralog fractions  
1478 generated through 10,000 bootstrapped random sampling. The enrichment of diapause-specialized paralogs  
1479 pairs within each bin is compared to genome-wide expectation (reference). Median and quartiles are  
1480 indicated by dashed lines. Compared to the reference, paralogs with specialization in diapause are enriched  
1481 among genes with very ancient duplication times and depleted among genes with ancient and recent or very  
1482 recent duplication times, respectively. *P*-values from Chi-square test. (D) Fraction of total paralog pairs  
1483 within each of the very ancient (left), ancient (middle), and recent/very recent (right) binned categories.  
1484 Violin plots represent distribution of observed vs expected specialized paralog fractions generated through  
1485 10,000 bootstrapped random sampling. Median and quartiles are indicated by dashed lines. Only paralogs  
1486 that have experienced a single duplication event were included in this analysis. The enrichment of diapause-  
1487 specialized paralogs pairs within each bin is compared to genome-wide expectation (reference). Compared  
1488 to the reference, paralogs with specialization in diapause are enriched among genes with very ancient  
1489 duplication times and depleted among genes with ancient and recent or very recent duplication times  
1490 respectively, indicating that our results are not affected by gene family size. *P*-values from Chi-square test.  
1491 (E) Fraction of total paralog pairs within each of the very ancient (left), ancient (middle), and recent/very  
1492 recent (right) binned categories. For each gene family only a single paralog pair with highest similarity was  
1493 used (e.g. in the following tree, (A, (B, C)), only pair B-C would be kept while A-B and A-C would be  
1494 discarded). The enrichment of diapause-specialized paralogs pairs within each bin is compared to genome-  
1495 wide expectation (reference). Compared to the reference, paralogs with specialization in diapause are  
1496 enriched among genes with very ancient duplication times and depleted among genes with ancient and  
1497 recent or very recent duplication times respectively, indicating that our results are not affected by gene  
1498 family size. (F) Fraction of total paralog pairs within each of the very ancient (left), ancient (middle), and  
1499 recent/very recent (right) binned categories. Violin plots represent distribution of observed vs expected  
1500 specialized paralog fractions generated through 10,000 bootstrapped random sampling. Median and  
1501 quartiles are indicated by dashed lines. The enrichment of non-diapause-specialized paralogs pairs within  
1502 each bin is compared to genome-wide expectation (reference). Compared to the reference, paralogs with no  
1503 specialization in diapause are depleted among genes with very ancient duplication times and enriched  
1504 among genes with ancient and recent or very recent duplication times respectively, suggesting that our  
1505 results are specific to diapause-specialized paralogs. (G) Overlap between genes upregulated during  
1506 diapause in the African turquoise killifish (blue circle) and genes from the African turquoise killifish that  
1507 showed a signature of positive selection at the level of protein sequence (red circle). The overlap between  
1508 the two categories is not significant ( $P = 0.121$ , hypergeometric test).

Figure S5

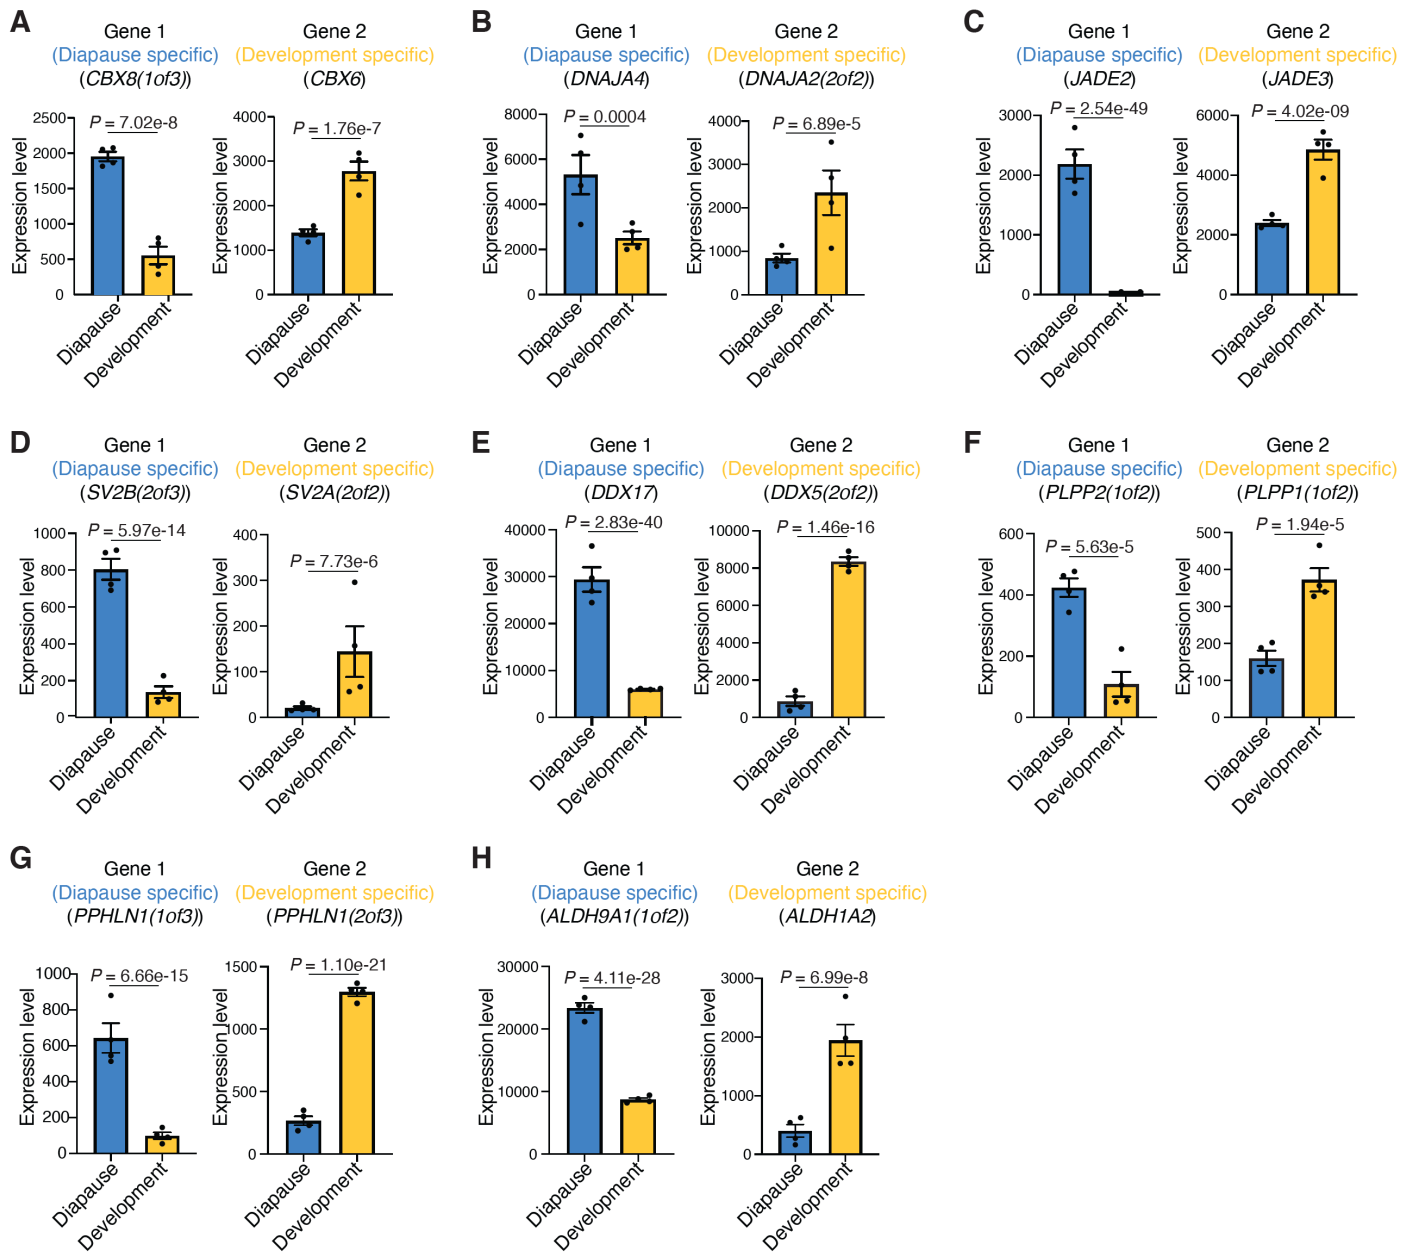

1509 **Figure S5. Additional examples of diapause-specialized paralogs in South American killifish. (A-H)**  
1510 Examples of paralog gene pairs, with specialized expression of gene 1 in diapause (blue) and gene 2 in  
1511 development (yellow) in South American killifish (*Austrofundulus limnaeus*). Displayed gene names are  
1512 the assigned name of relevant ortholog in African turquoise killifish for comparison. Bars represent mean  
1513 expression level (normalized DESeq2 count) across replicates in diapause or development state. Dots show  
1514 normalized DESeq2 counts in each replicate. Error bar is standard error of mean (SEM). *P*-values from  
1515 DESeq2 Wald test.

Figure S6

**A** Significant overlap between diapause-specialized paralogs

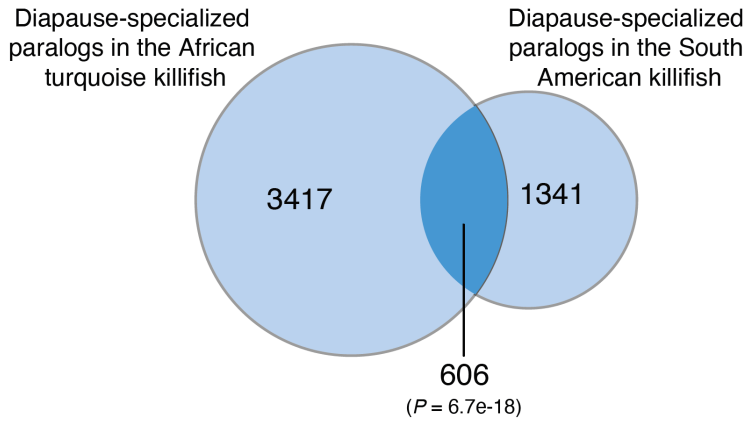

**B** Genome-wide paralog specilization in the African turquoise killifish and South American killifish

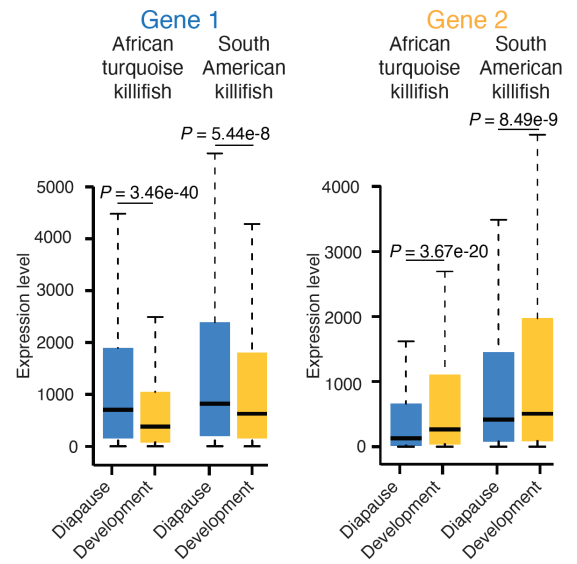

**C** Expression of diapause-specialized paralogs during development

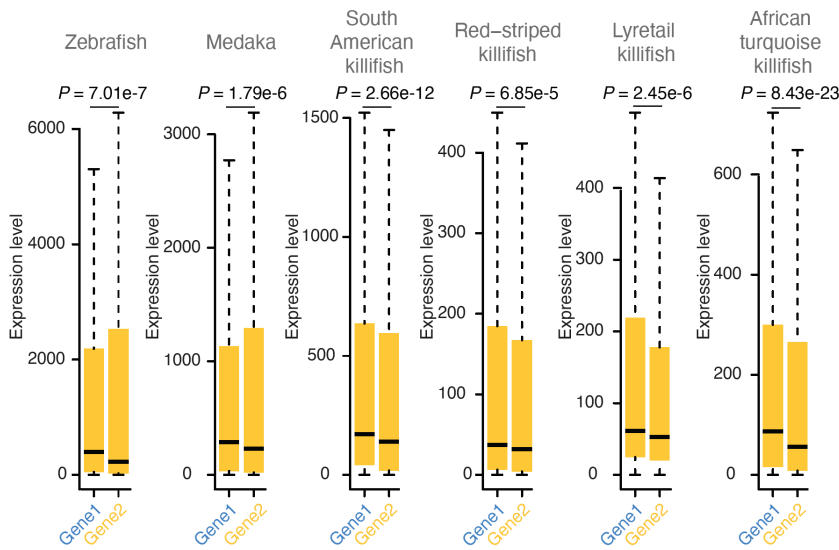

1516 **Figure S6. Comparison of diapause gene expression and specialized paralogs in African turquoise**  
1517 **killifish and South American killifish.** (A) Overlap between paralog pairs specialized for diapause in both  
1518 African turquoise killifish and South American killifish. Paralog pairs were included only if both the genes  
1519 in the pairs were orthologous to each other with the same duplication time. There is a significant overlap of  
1520 these pairs between the two killifish species ( $P = 6.7e-18$ , Hypergeometric test). (B) Comparison of  
1521 diapause-specialized paralogs identified in the African turquoise killifish to their orthologs in the South  
1522 American killifish. Both the diapause-specialized genes (*Gene 1* cohort; left panel) and the development-  
1523 specialized gene (*Gene 2* cohort; right panel) exhibit the same expression pattern genome-wide in both the  
1524 fish species. These expression differences were significant in both African turquoise killifish and South  
1525 American killifish.  $P$ -values from Kolmogorov-Smirnov test. (C) Expression of African turquoise killifish  
1526 diapause-specialized paralogs and their one-to-one orthologs in other species. Expression was evaluated  
1527 during Pre-Diapause time point and  $P$ -values were calculated using Kolmogorov-Smirnov test. In all  
1528 species evaluated, the expression pattern was similar at the comparable pre-diapause developmental time  
1529 point with diapause-specific gene (*Gene 1*) always the more highly expressed during the pre-diapause  
1530 developmental time point. This expression asymmetry is a known property of paralogs (24).

Figure S7

**A** Identification of diapause-specific ATAC-seq peaks in African turquoise killifish

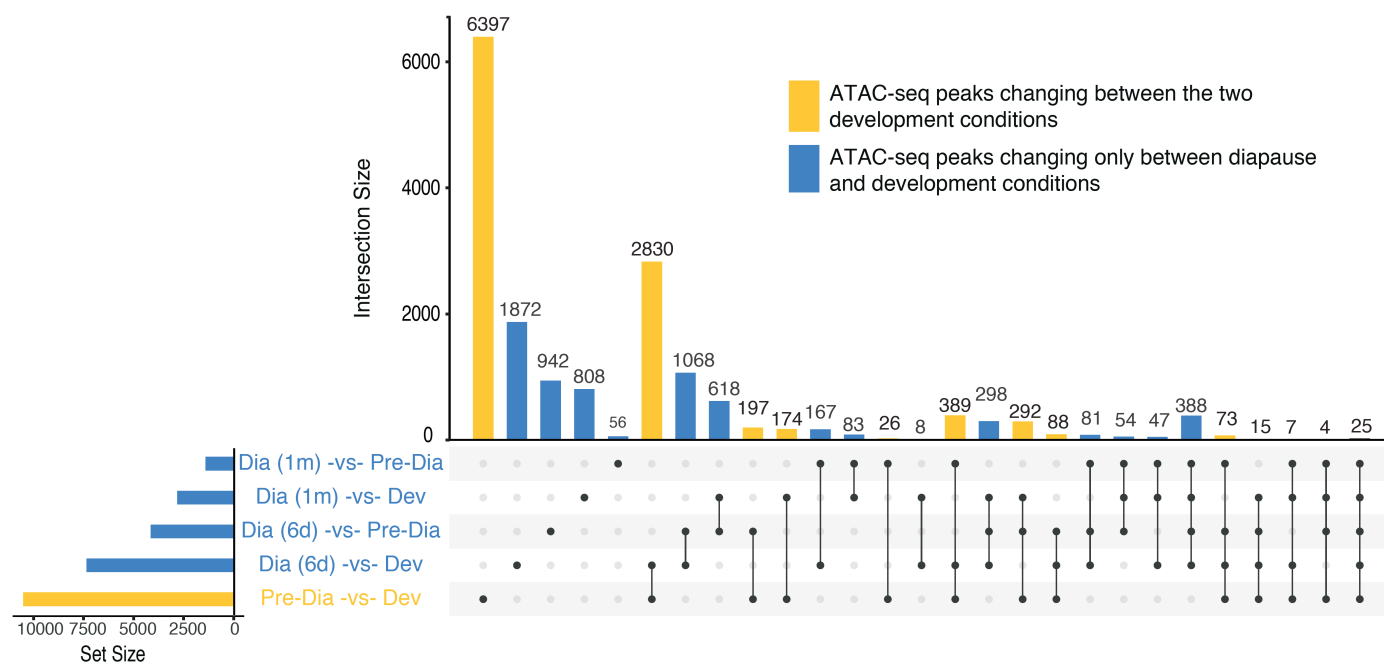

**B** Feature distribution of differential ATAC-seq peaks in diapause in African turquoise killifish

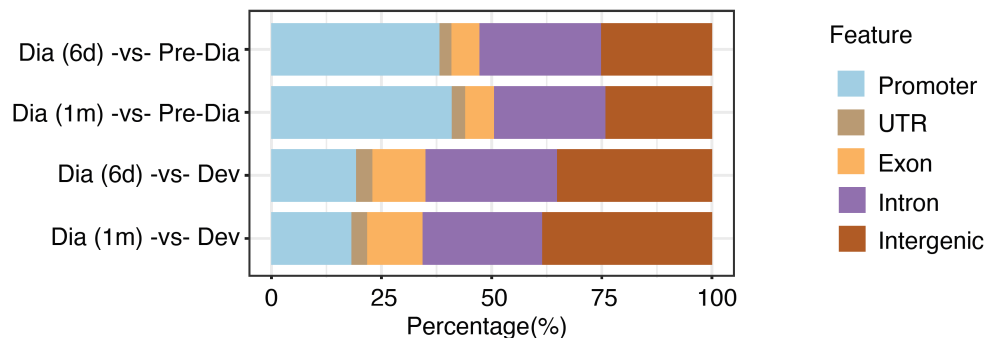

**C** Correlation between RNA-seq and ATAC-seq in diapause in African turquoise killifish

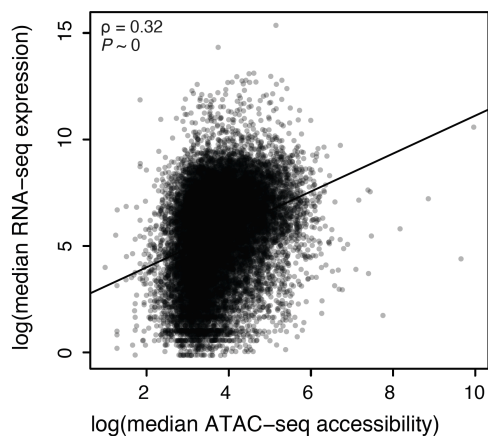

**D** Correlation between RNA-seq and ATAC-seq in development in African turquoise killifish

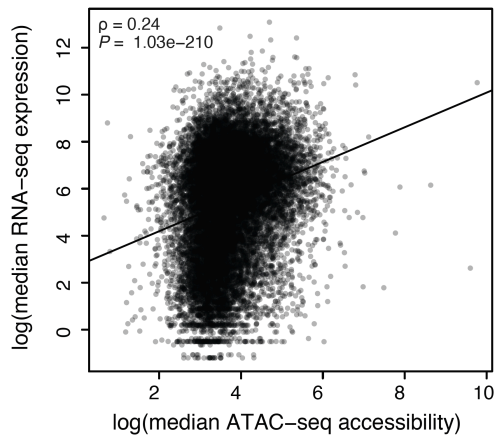

1531 **Figure S7. Characterization of ATAC-seq datasets in the African turquoise killifish and**  
1532 **other species.** (A) Upset plot depicting differentially accessible chromatin regions (ATAC-seq  
1533 peaks) between the consensus peak set for each biological timepoint surveyed in the African  
1534 turquoise killifish. The final set of differentially accessible chromatin regions used for analysis is  
1535 comprised of all intersections containing peaks that only change between diapause and  
1536 development conditions (blue histogram bins) while those that include a change between  
1537 developmental timepoints were excluded (yellow histogram bins). (B) Percentage breakdowns of  
1538 included diapause-specific, differentially accessible chromatin regions by genome feature in the  
1539 African turquoise killifish. Feature categories (Promoter, UTR, Exon, Intron, and Intergenic) were  
1540 made by consolidating more specific sub-feature categories provided by the DESeq2 pipeline. (C)  
1541 Correlation plot between the median gene expression (RNA-seq) and the median chromatin  
1542 accessibility (ATAC-seq) for all genes during diapause in African turquoise killifish ( $P \sim 0$ ,  
1543 Spearman correlation coefficient = 0.32). (D) Correlation plot between the median gene expression  
1544 (RNA-seq) and the median chromatin accessibility (ATAC-seq) for all genes during development  
1545 in the African turquoise killifish ( $P = 1.03e-210$ , Spearman correlation coefficient = 0.24)

Figure S8

**A** ATAC-seq library Transcription Start Site (TSS) enrichment in the African turquoise killifish and other killifish species

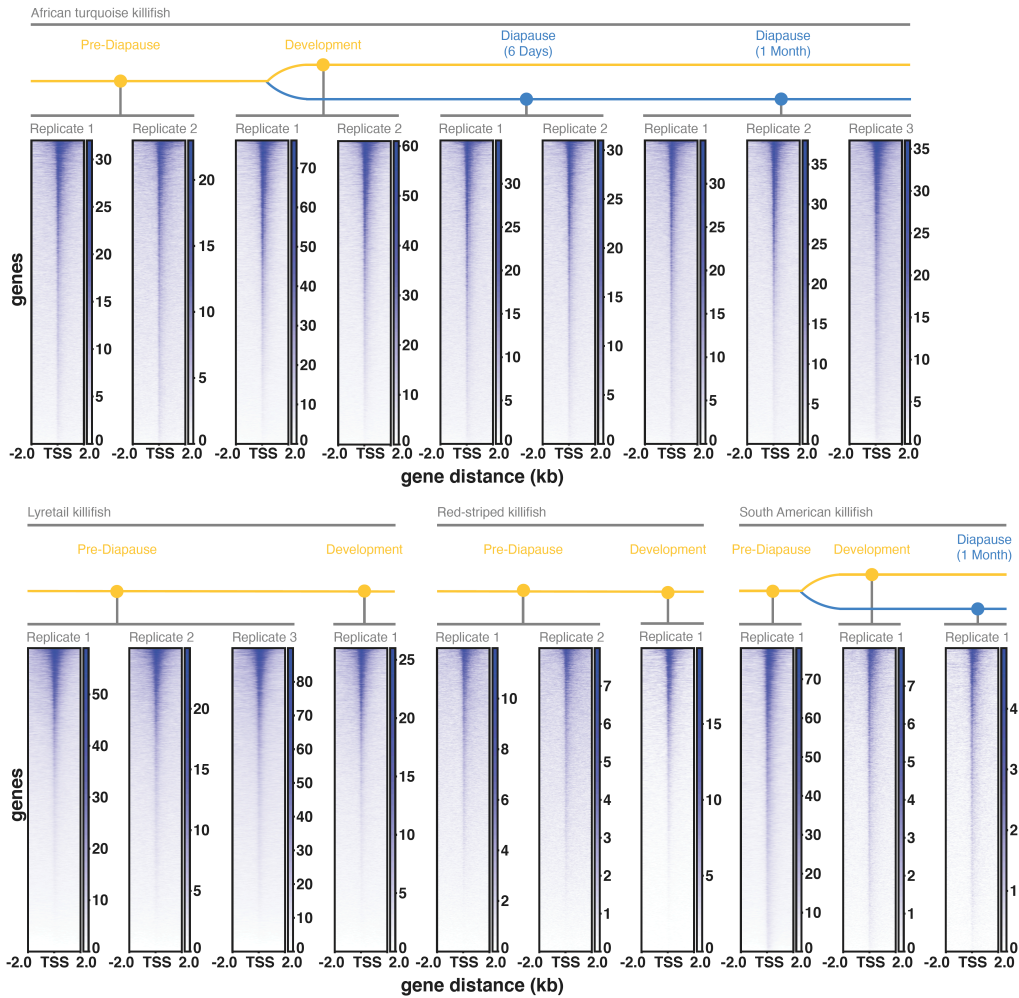

**B** ATAC-seq library nucleosome banding in the African turquoise killifish and other killifish species

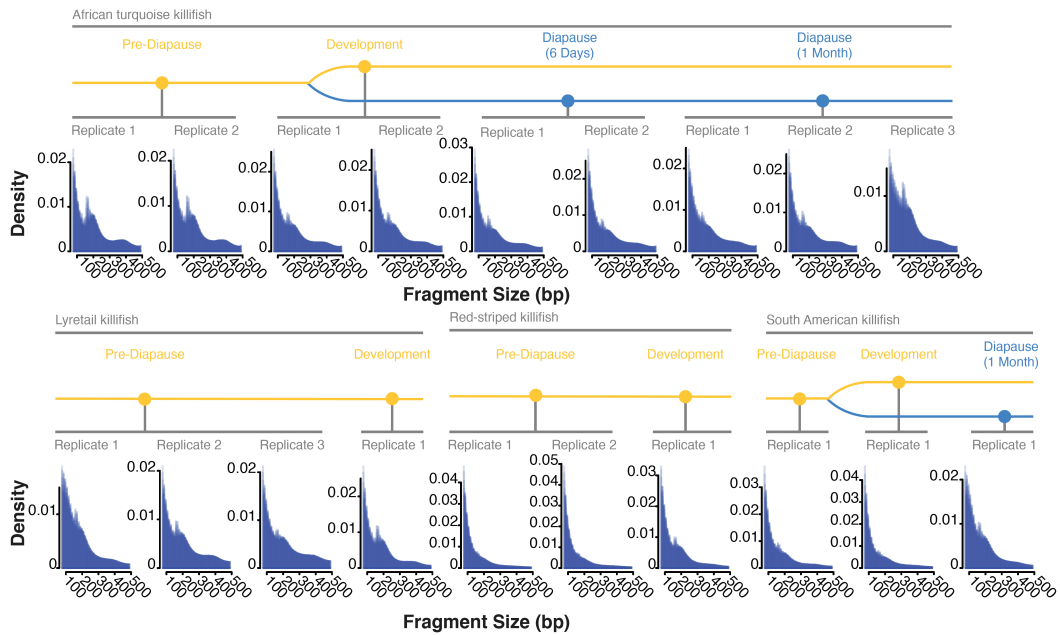



1546 **Figure S8. ATAC-seq library quality metrics in African turquoise killifish and other species.** (A) TSS  
1547 read enrichment compared to neighboring 2kb regions for each ATAC-seq library generated. An  
1548 enrichment of accessibility signal at TSS indicates good quality. (B) Nucleosome banding patten displaying  
1549 the presence/absence and intensity of the mono-, di-, and tri-nucleosome bands for each ATAC-seq library.

Figure S9

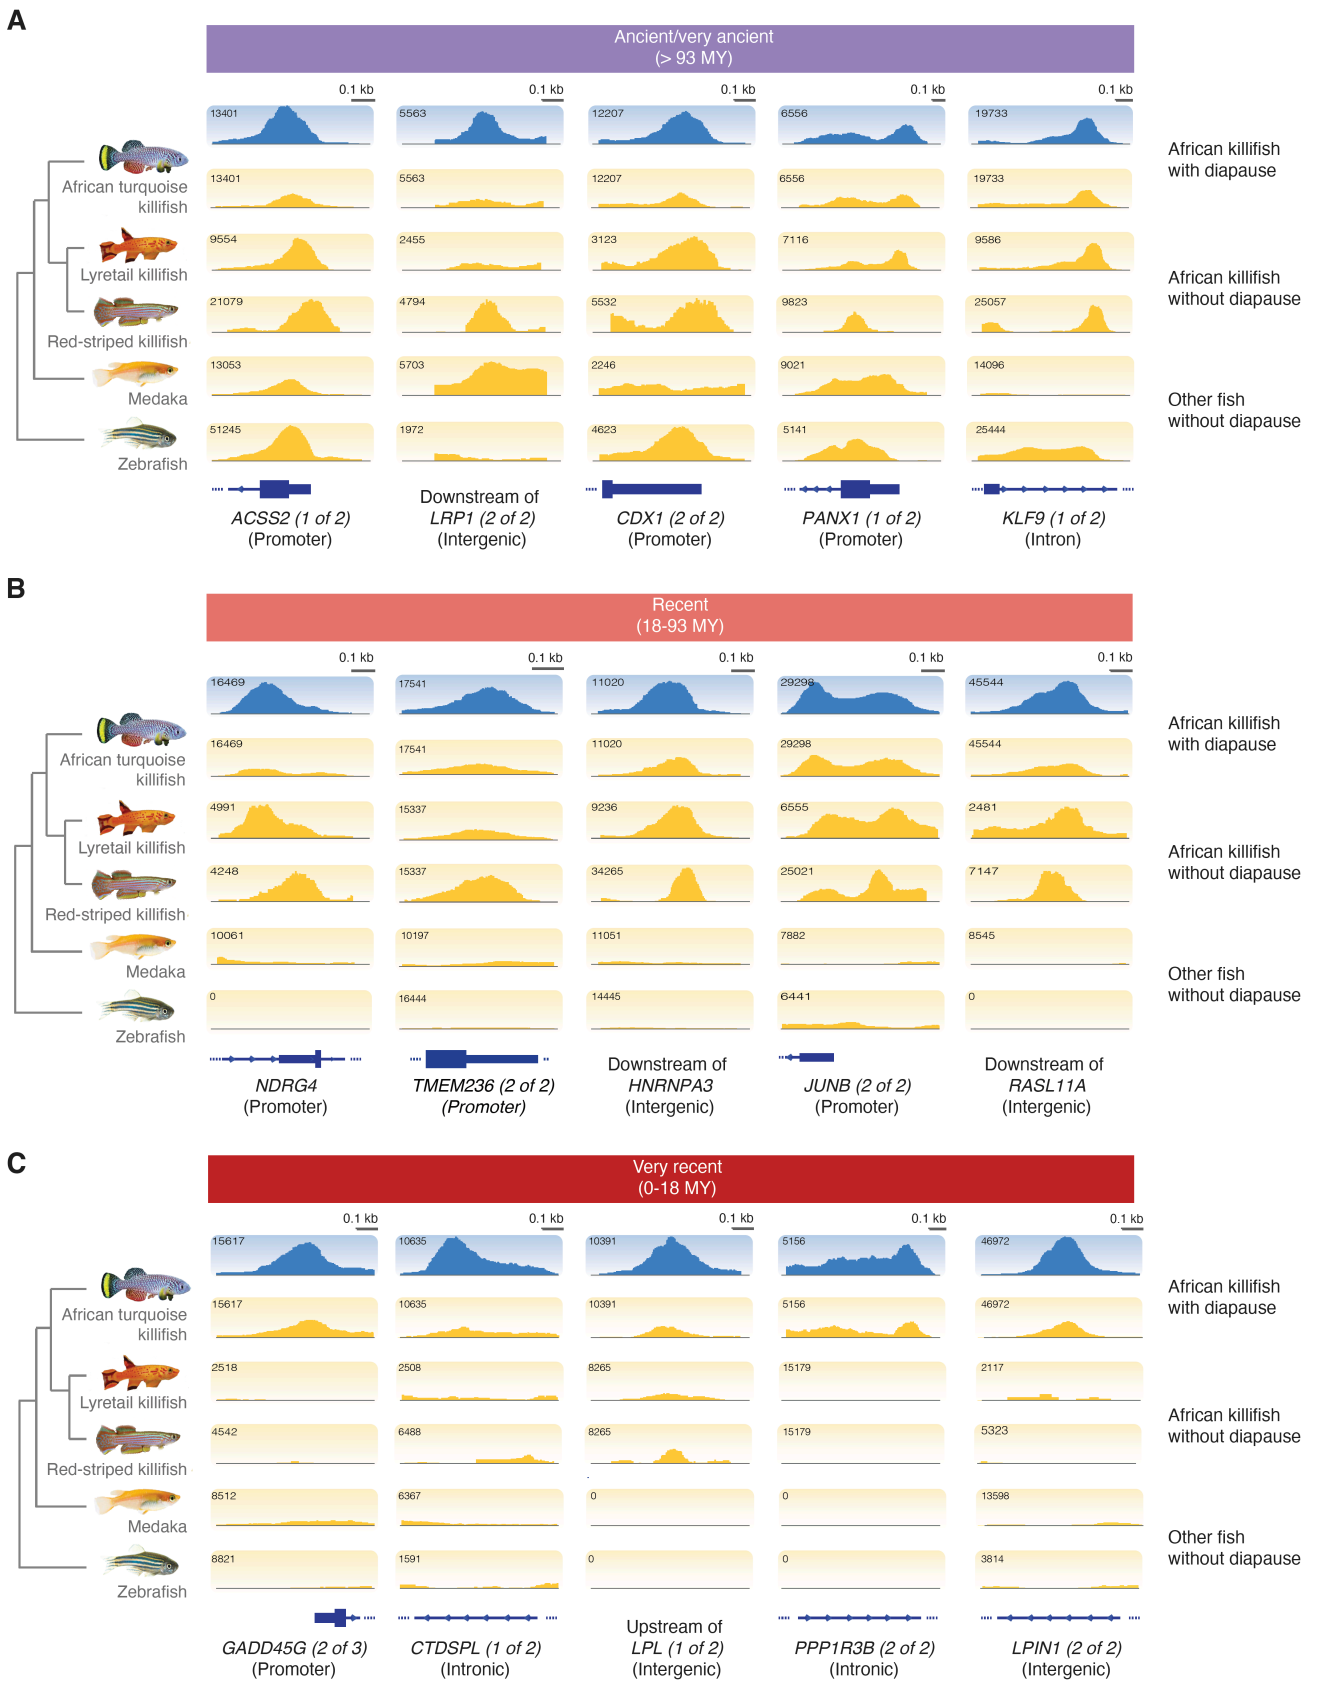

1550 **Figure S9. Additional examples of diapause-accessible (differential) ATAC-seq peaks and their cross-**  
1551 **species conservation.** IGV visualization tracks of chromatin accessibility for representative ATAC-seq  
1552 peaks across African turquoise, lyretail, and red-striped killifish in addition to medaka and zebrafish from  
1553 RPKM-normalized reads summed across replicates and biological timepoints (e.g., diapause and  
1554 development separately) to obtain single tracks for each species. The tree of species represents labeling  
1555 each track displays the evolutionary relationship between each evaluated species. Peaks displayed showcase  
1556 the three conservation categories evaluated. (A) Conserved chromatin accessibility across all species  
1557 (ancient/very ancient). (B) Conserved chromatin accessibility exclusive to surveyed killifish species  
1558 (recent). (C) Chromatin accessibility exclusive to the African turquoise killifish (very recent). Each region  
1559 is labeled as one of the three types of genomic features on which peaks were evaluated: promoters, introns,  
1560 and intergenic regions. Peaks located in proximity to *RASL11A* (B, column 5) and *GADD45G* (C, column  
1561 1) are at specialized paralogs (fig. S1G and S1H, respectively).

Figure S10

**A Genome-wide assessment of sequence and chromatin conservation**

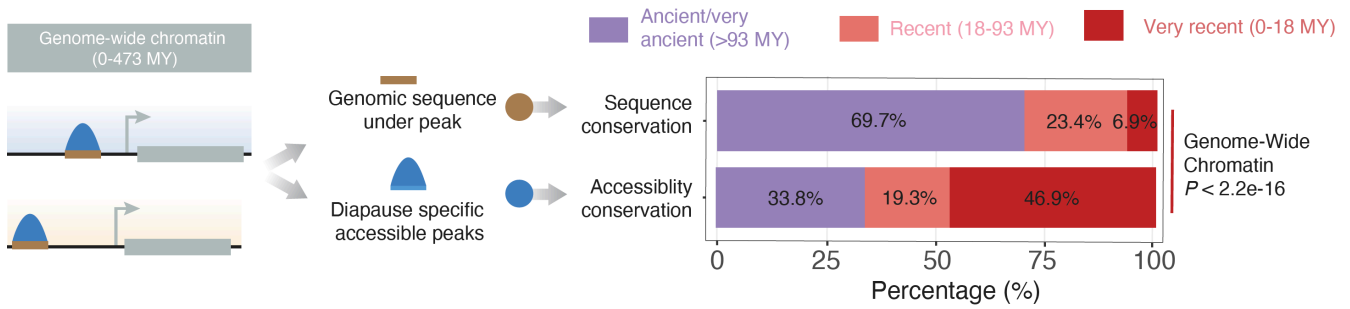

**B Assessment of diapause-accessible chromatin at ancient paralogs by genomic feature**

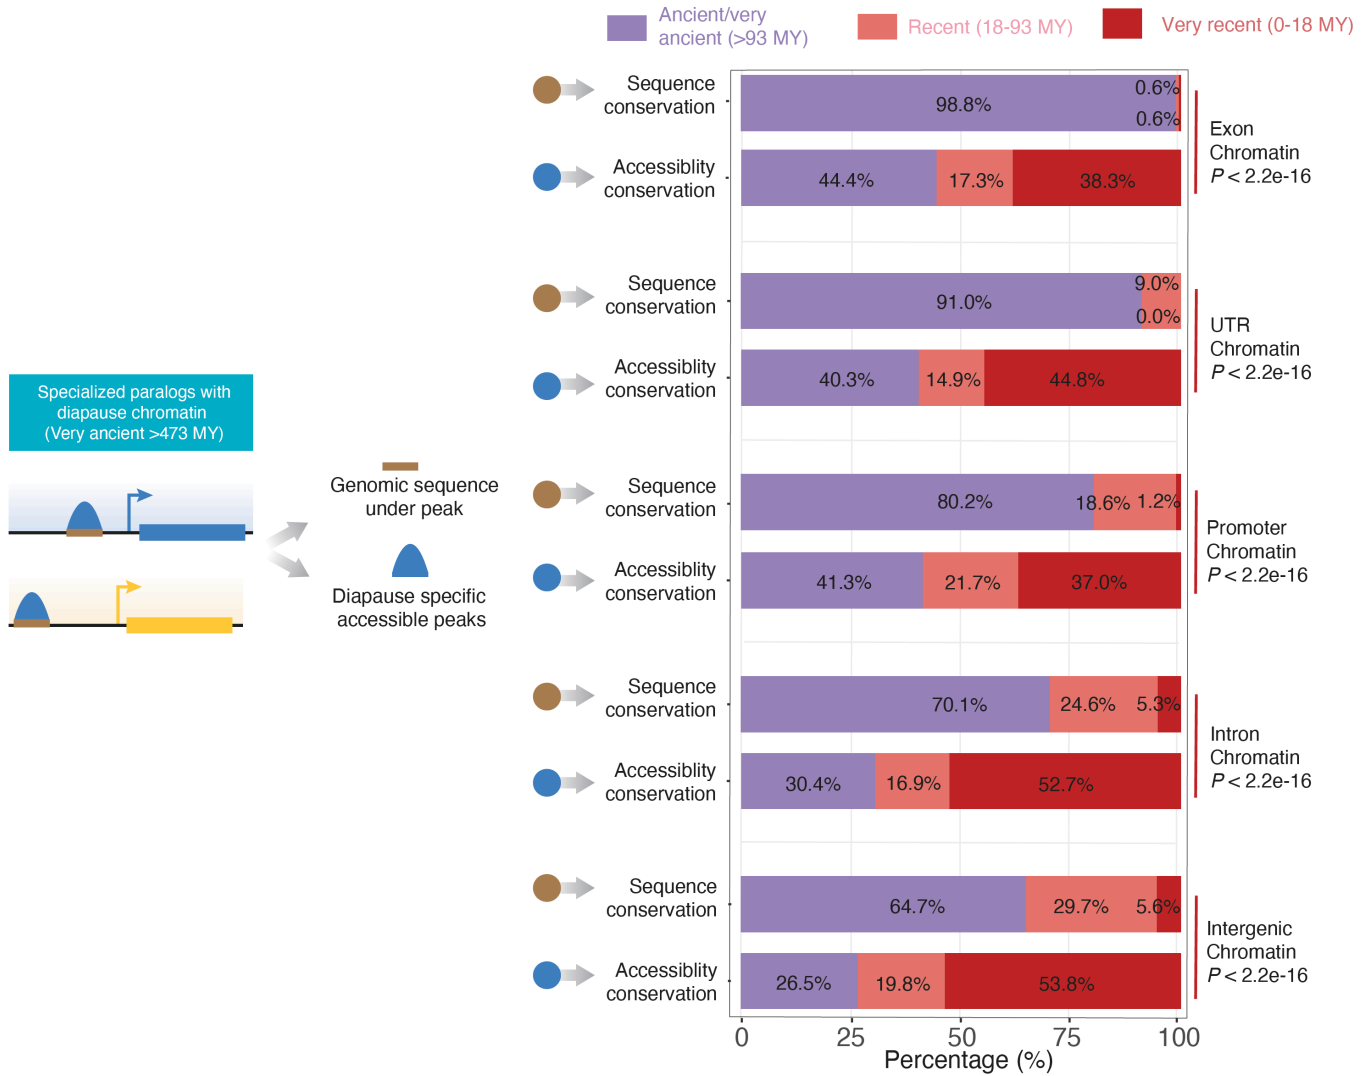

1562 **Figure S10. Genomic sequence and chromatin accessibility conservation breakdown. (A)**  
1563 Conservation analysis of genomic sequence and chromatin accessibility genome-wide for all the significant  
1564 diapause specific chromatin peaks (see Fig. 3E for paralog specific result). Left panel: Schematic of the  
1565 analysis. Right panel: Percentage (e.g. conservation) of alignable regions containing diapause-specific  
1566 chromatin accessibility (upper) and the conservation of diapause-specific chromatin accessibility (lower)  
1567 genome-wide (B) Conservation analysis of genomic sequence and chromatin accessibility at very ancient  
1568 paralogs with specialization in diapause vs. development delineated by genomic feature in order of  
1569 decreasing conservation: accessible chromatin in exons (upper pair), untranslated regions (UTRs) (upper-  
1570 middle pair), promoters (middle pair), introns (middle-lower pair), and intergenic regions (lower pair). Left  
1571 panel: Schematic of the analysis. Right panel: Percentage (e.g. conservation) of alignable regions containing  
1572 diapause-specific chromatin accessibility (upper) and the conservation of diapause-specific chromatin  
1573 accessibility (lower) near specialized ancient paralogs.

Figure S11

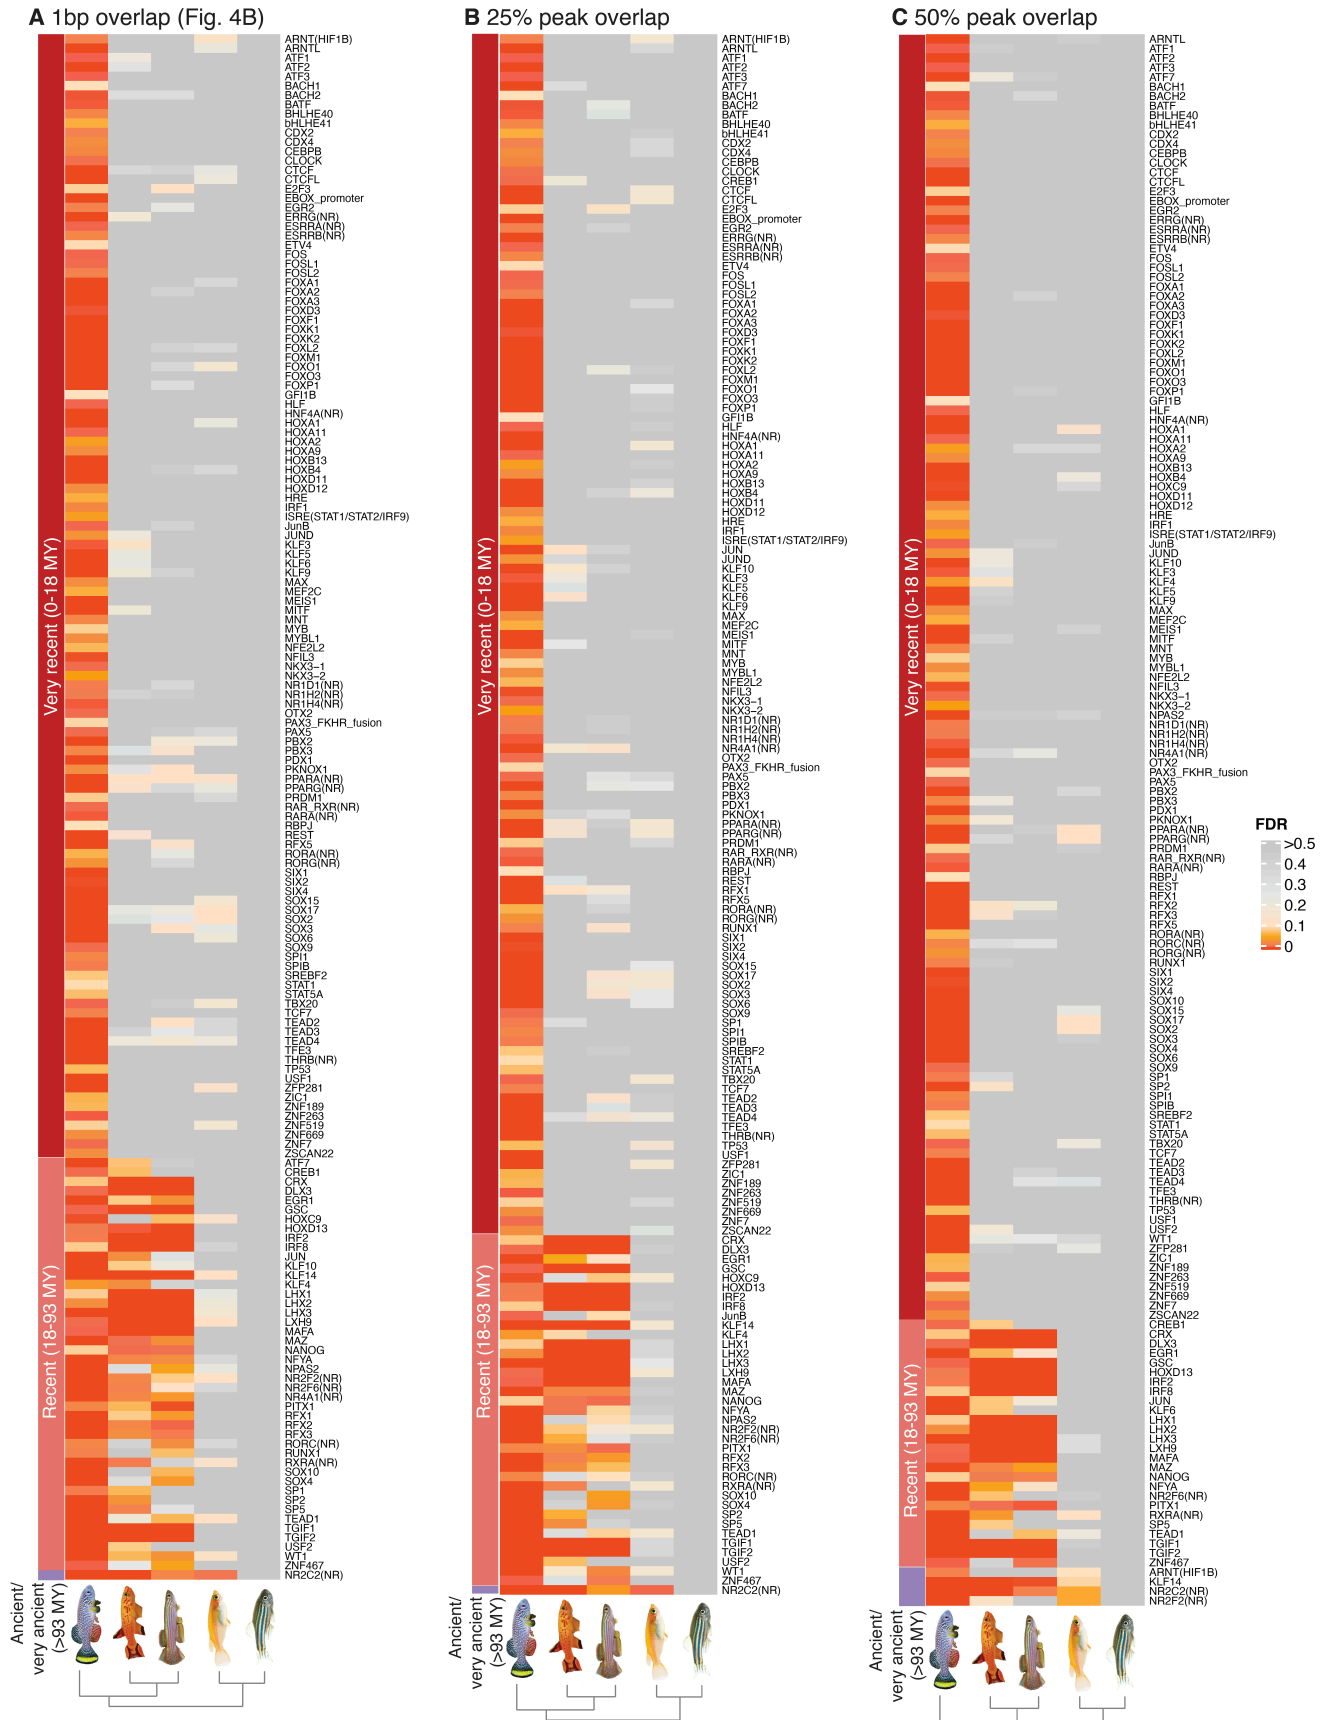

1574 **Figure S11. Transcription-factor binding motifs enrichment across species using various**  
1575 **conservation cutoffs.** Conservation in other fish species of transcription-factor binding motifs enriched in  
1576 diapause-specific chromatin accessible regions in the African turquoise killifish. (A) For accessible  
1577 chromatin regions (ATAC-seq peaks) in other species with at least a single base pair overlap with a  
1578 diapause-specific chromatin accessible regions in the African turquoise killifish. (B) For accessible  
1579 chromatin regions (ATAC-seq peaks) in other species with at least 25% peak overlap with a diapause-  
1580 specific chromatin accessible regions in the African turquoise killifish. (C) For accessible chromatin regions  
1581 (ATAC-seq peaks) in other species with at least 50% peak overlap with a diapause-specific chromatin  
1582 accessible regions in the African turquoise killifish. The majority of diapause-specific motifs are very  
1583 recent (i.e. specific to African turquoise killifish) and are not enriched in killifish species without diapause  
1584 or outgroup species with all the three criteria.

Figure S12

**A Motif sequence alignment examples**

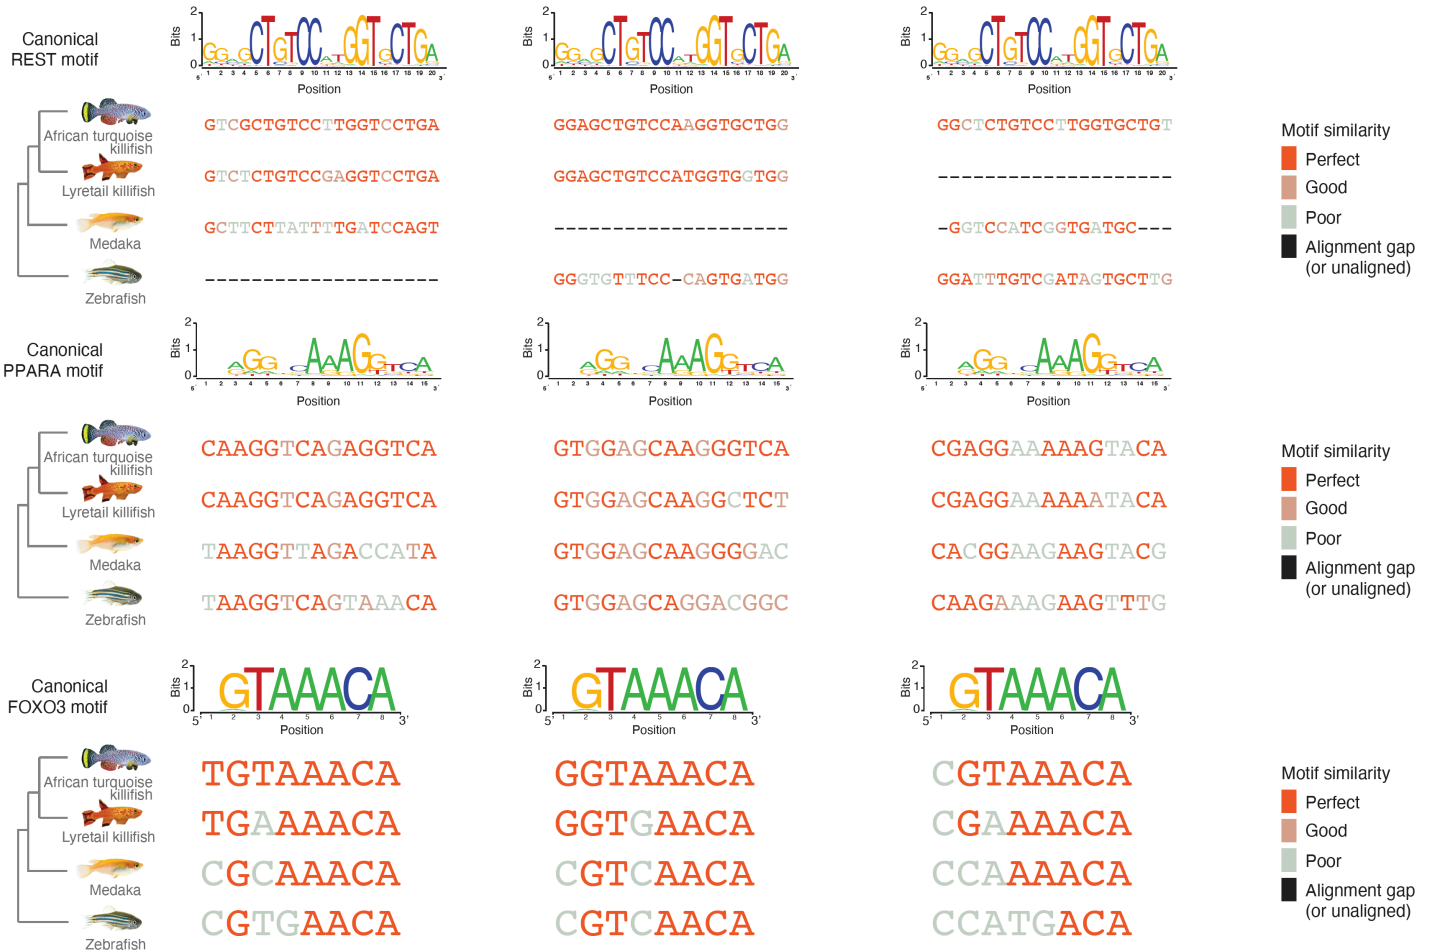

**B Motif sequence aggregates**

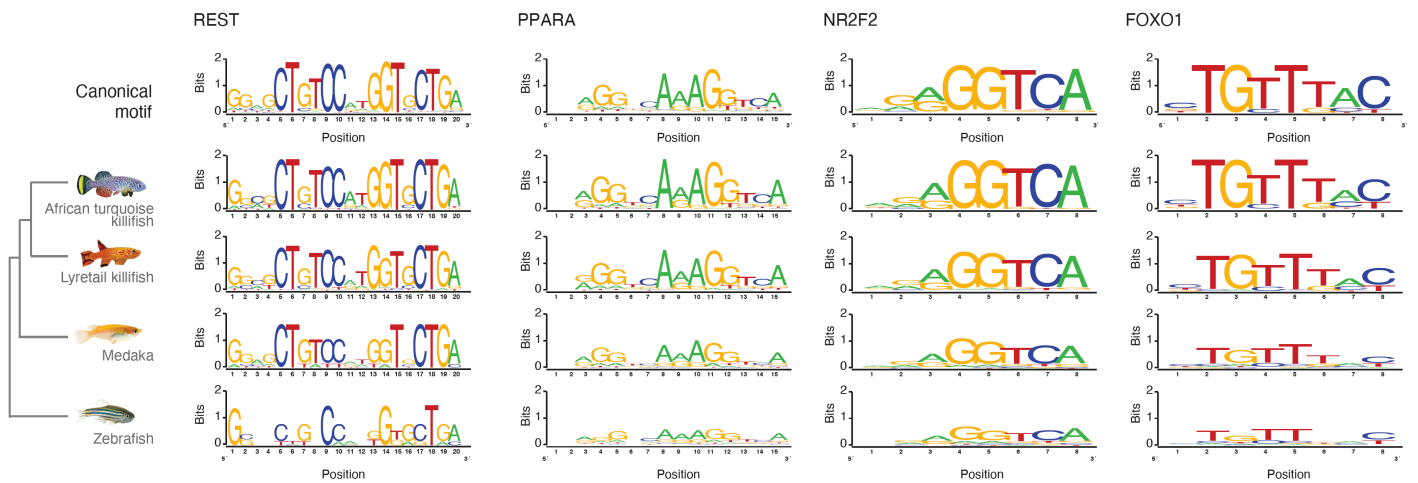



1585 **Figure S12. Additional examples and aggregates from motif evolution analysis.** (A) Representative  
1586 examples of REST (upper), PPARA (middle), and FOXO3 (lower) transcription factor binding sites in  
1587 African turquoise and the aligned regions in other evaluated fish species. Aligned sequences colored in  
1588 accordance with their closeness-of-fit to the information content of HOMER-produced consensus motif  
1589 logo (top track). Only a single sequence is provided for both lyretail killifish and red-striped killifish as  
1590 they are aligned to the same draft genome. (B) Aggregated informational content (bits) across all REST  
1591 (left), PPARA (left-center), NR2F2 (right-center), and FOXO1 (right) transcription factor binding sites in  
1592 diapause-accessible (differential) chromatin and aligned regions in other species regardless of accessibility  
1593 status. The canonical motif logos are provided for comparison (upper logo). During sequence aggregation  
1594 gaps were removed along with sequence aligned to gaps (i.e., exact base pair to base pair alignment with  
1595 the African turquoise killifish was used).

Figure S13

**A Schematic of ancestral reconstruction**

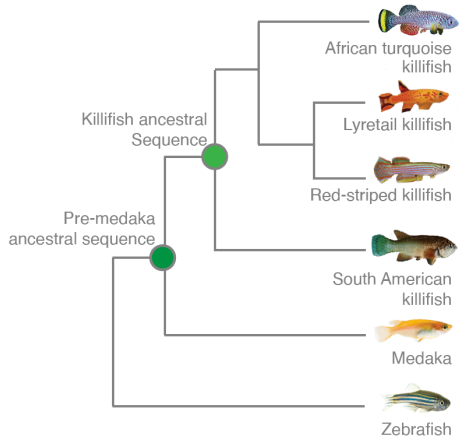

**B Overlap of positive selection at regulatory regions using multiple ancestral sets**

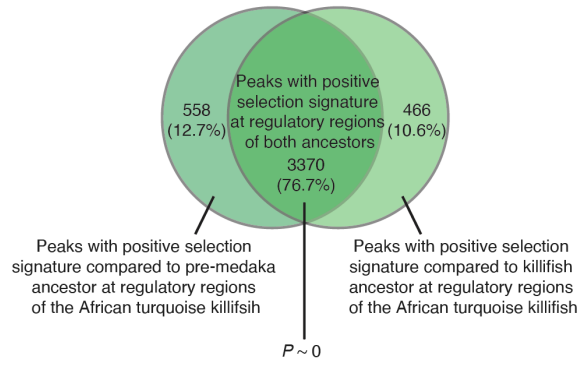

**C Motif enrichment of peaks with positive selection signature at regulatory regions**

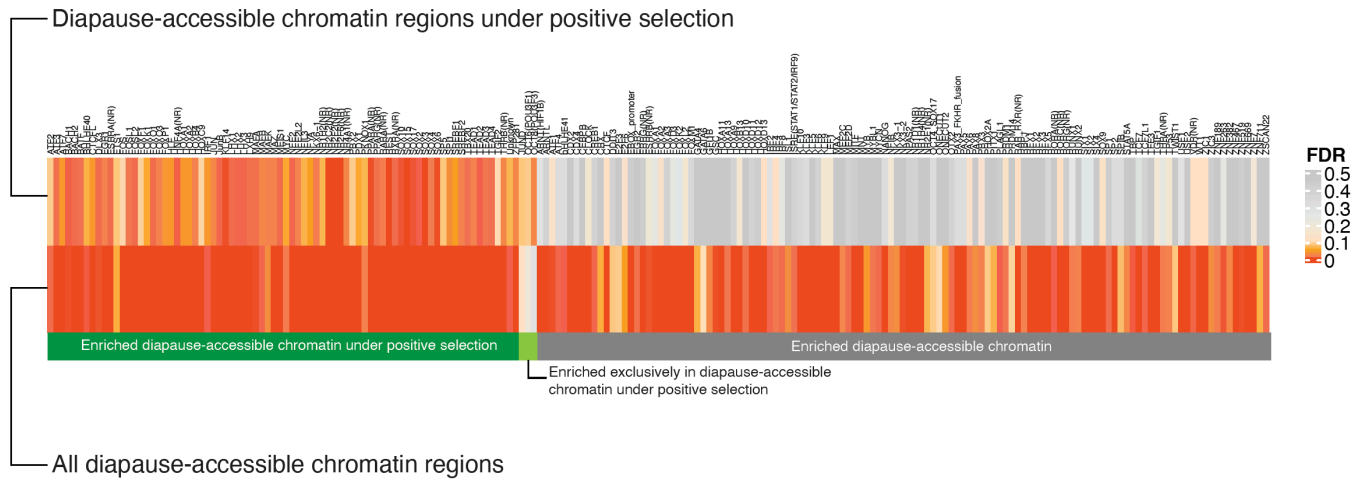

1596 **Figure S13. Positive selection analysis and motif enrichment in accessible chromatin regions.** (A)  
1597 Schematic tree showing the evolutionary timing of inferred ancestral sequences used for positive selection  
1598 analysis on accessible chromatin regions (99). The green dots represent the inferred pre-medaka and  
1599 killifish common ancestral sequences. The ancestral sequences were constructed using aligned sequences  
1600 from each species in the tree with the site of green dots delineating the branches of the phylogeny classified  
1601 as in-group and out-group respectively (see methods). (B) The overlap between peaks with a positive  
1602 selection signature as calculated using the inferred pre-medaka (left) and killifish (right) ancestral sequence  
1603 respectively. The overlap between the two was significant ( $P \sim 0$ , hypergeometric test). We used the union  
1604 of the two sets for determining the positive selection signature overlap with diapause-accessible  
1605 (differential) chromatin near ancient, specialized paralogs (Fig. 4G). (C) Enrichment of transcription factor  
1606 binding motifs among diapause-accessible chromatin peaks near ancient, specialized paralogs with a  
1607 positive selection signature. Motifs such as REST, FOXO and PPAR are significantly enriched in the  
1608 positively selected chromatin regions.

Figure S14 Examples of transposable elements overlapping with TF binding sites

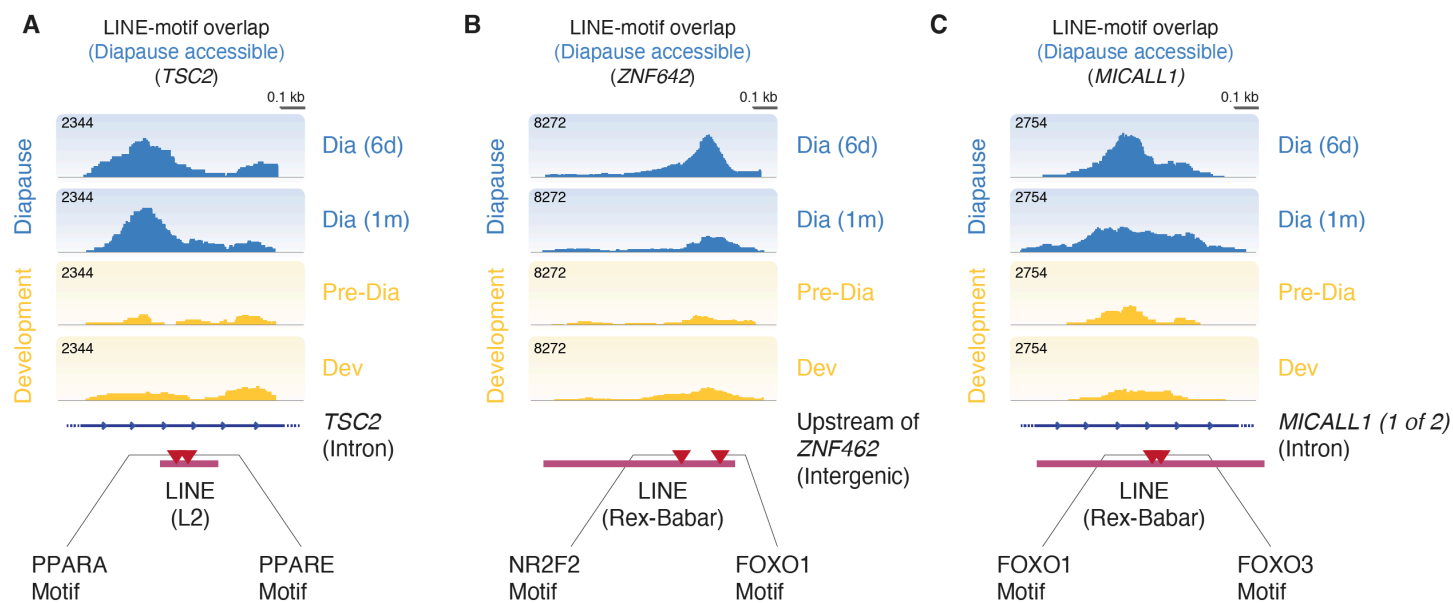

1609 **Figure S14. Additional examples of TE overlapping transcription factor binding sites in African**  
1610 **turquoise killifish.** (A-C) Genome browser (IGV) chromatin accessibility track of representative example  
1611 peaks containing a TE-embedded transcription factor binding site. ATAC-seq library timepoints for both  
1612 diapause (6 days and 1 month post entry) and development (Pre-Diapause and Development) are  
1613 represented by replicated-summed, RPKM-normalized tracks. Blue lines at the bottom represent the  
1614 genomic architecture (intron) at the region and magenta boxes display the location and size of TEs in the  
1615 region with the motif binding sequence marked (red triangle).

Figure S15

**A** Significantly different lipid classes in diapause

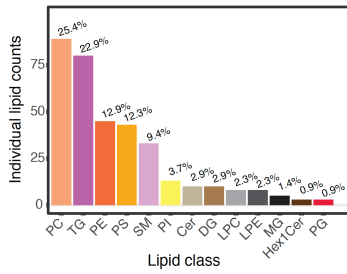

**B** Triglycerides metabolism enzymes are upregulated, and many regulators are differentially expressed in diapause

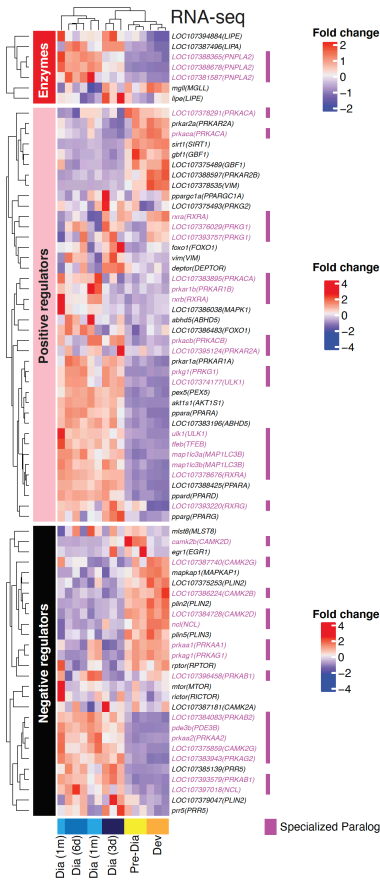

**C** Significant class-specific triglyceride content fold-change between killifish species

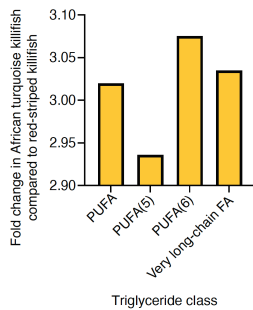

**D** Lipid abundance fold changes between African turquoise killifish time course and red-striped killifish

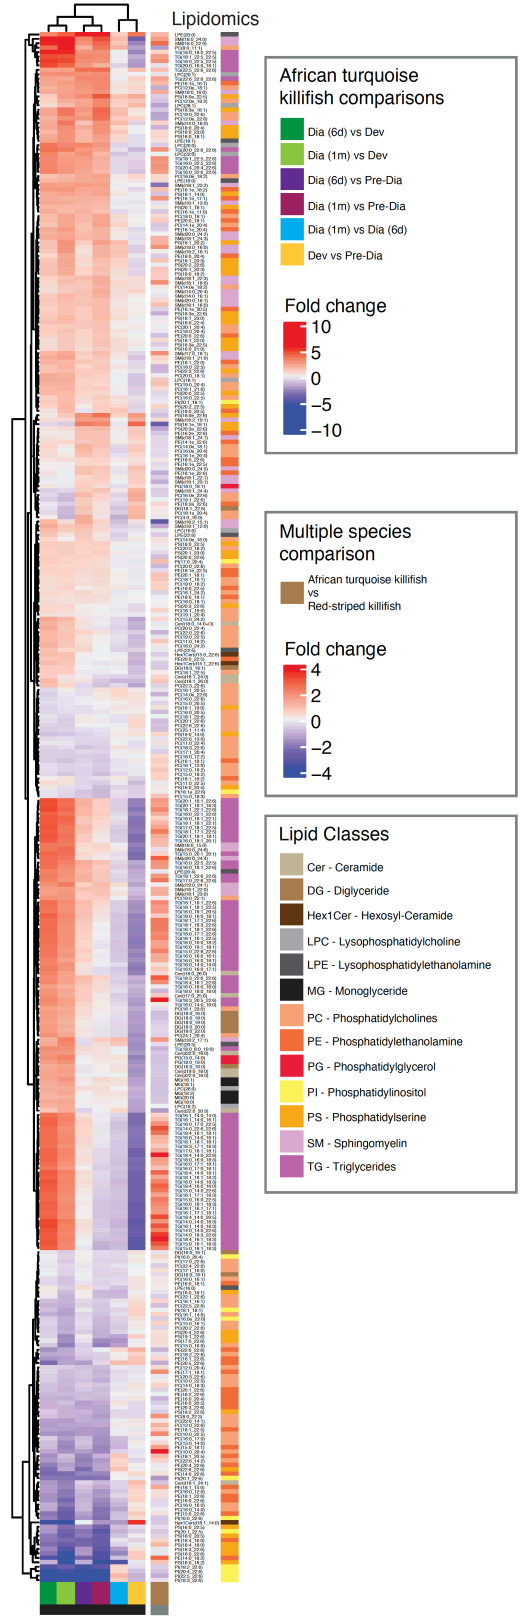

1616 **Figure S15. Analysis of class level triglycerides (TG) in the African turquoise killifish and lyretail**  
1617 **killifish.** (A) Bar graph representing the number of diapause-specific differential lipids in each lipid class.  
1618 Phosphatidylcholines (PC) and Triglycerides (TG) constitute most of the differential lipids that change in  
1619 diapause. PE, Phosphatidylethanolamine; PS, Phosphatidylserine; SM, Sphingomyelin; PI,  
1620 Phosphatidylinositol; Cer, Ceramide; DG, Diglyceride; LPC, Lysophosphatidylcholine; LPE,  
1621 Lysophosphatidylethanolamine; MG, Monoacylglyceride; Hex1Cer, Hexosyl-Ceramide; PG,  
1622 Phosphatidylglycerol. (B) RNA-seq expression levels of the genes involved in triglyceride metabolism  
1623 divided by their functions: enzymes (upper heatmap), positive regulators of triglyceride metabolism  
1624 (middle heatmap), and negative regulators of triglyceride metabolism (lower heatmap). Genes labeled in  
1625 magenta are members of diapause-development specialized paralog pairs. Specifically, enzymes related to  
1626 triglyceride metabolism were strongly upregulated during diapause (left columns) and downregulated  
1627 during development (right columns). Several positive and negative regulators of TG metabolism were  
1628 also upregulated and downregulated in diapause respectively, though the pattern was more variable. (C)  
1629 Comparison between triglyceride subclass levels between African turquoise killifish and red-striped  
1630 killifish, shown as fold change in total lipid abundance. All triglycerides belonging to each class (PUFA,  
1631 poly-unsaturated fatty acids cumulatively (PUFA) or with specifically with five (5) or six (6)  
1632 unsaturated/double-bond sites respectively; Very Long-Chain FA, long-chain fatty acids that contain 22  
1633 carbons) were summed for this analysis (see Methods). The same developmental stage (pre-diapause  
1634 stage) was compared between the two species. African turquoise killifish has a higher TG content at the  
1635 Pre-Diapause stage compared to red-striped killifish. (D) Heatmap representing the fold change of all  
1636 significant lipids species between diapause vs. development in the African turquoise killifish (left panels)  
1637 and between the African turquoise killifish vs. red-striped killifish (development only, rightmost panel).  
1638 Fold change values are plotted between each pair-wise comparison between diapause and development  
1639 time points, or the two development time points. Lipids were included if significance was reached in any  
1640 single comparison. The rightmost panel shows the fold change values of the same lipids in the African  
1641 turquoise killifish compared to the red-striped killifish.

Figure S16

**A** Distribution of genes upregulated in diapause in paralogs and singletons

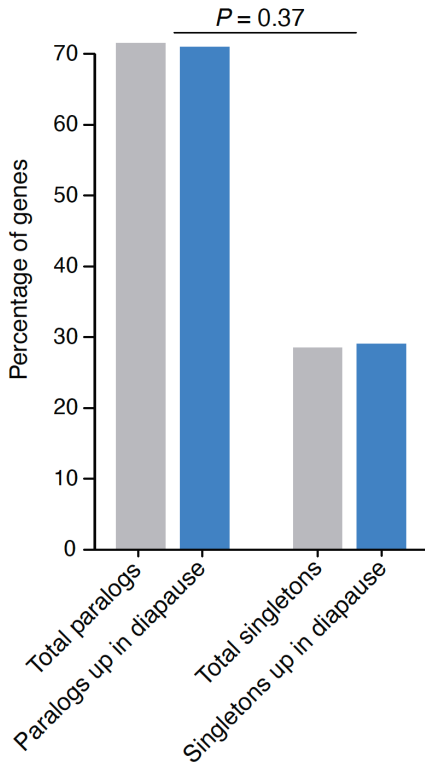

**B** Motif enrichment comparison for singletons and paralogs

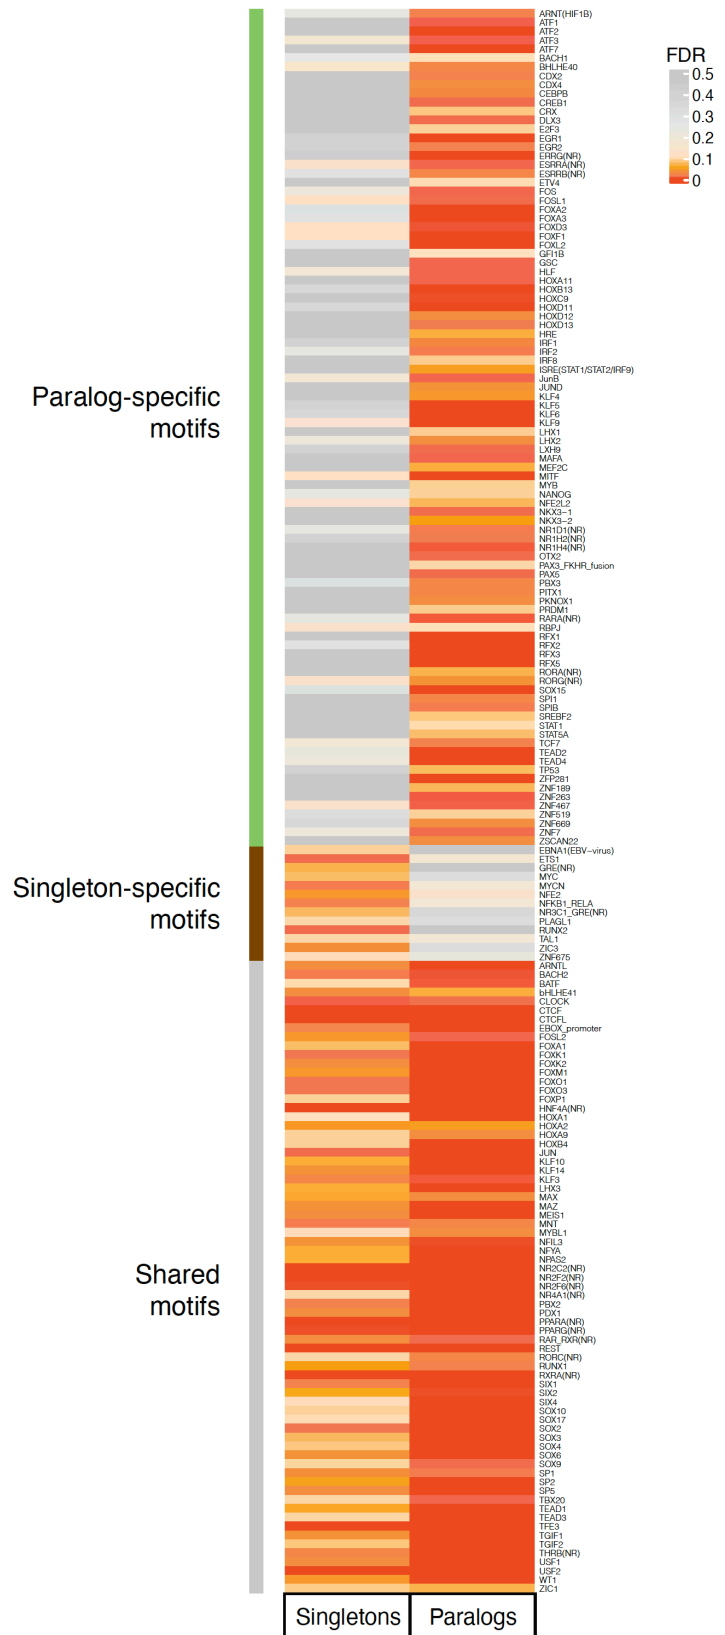



1642 **Figure S16. Comparison of paralogs and singleton genes in the African turquoise killifish.** (A)  
1643 Comparison of paralogs and singleton genes upregulated in diapause with their respective genome-wide  
1644 expectation. Neither paralogs nor singletons are overrepresented among diapause-upregulated genes ( $P =$   
1645  $0.37$  from Chi-squared test). (B) Transcription-factor binding motif enrichment in diapause-accessible  
1646 chromatin regions (ATAC-seq peak) near singletons (left column) and paralogs (right column) in the  
1647 African turquoise killifish. The majority of enriched motifs are either specific to paralogs or shared between  
1648 paralogs and singletons with a minority being singleton specific (13 motifs), suggesting that the genomic  
1649 regulatory landscape might be different for paralogs and singletons.

Figure S17

**A** Alignment-independent promoter motif enrichment between the African turquoise killifish and the lyretail killifish

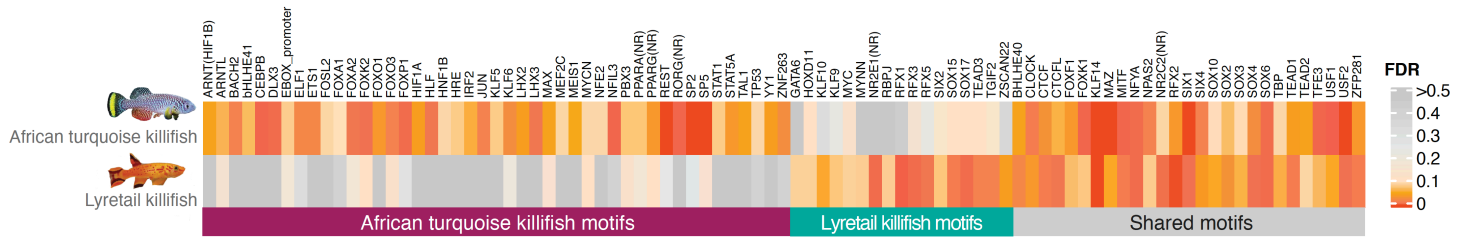

**B** Alignment-independent promoter motif enrichment between the African turquoise killifish and the red-striped killifish

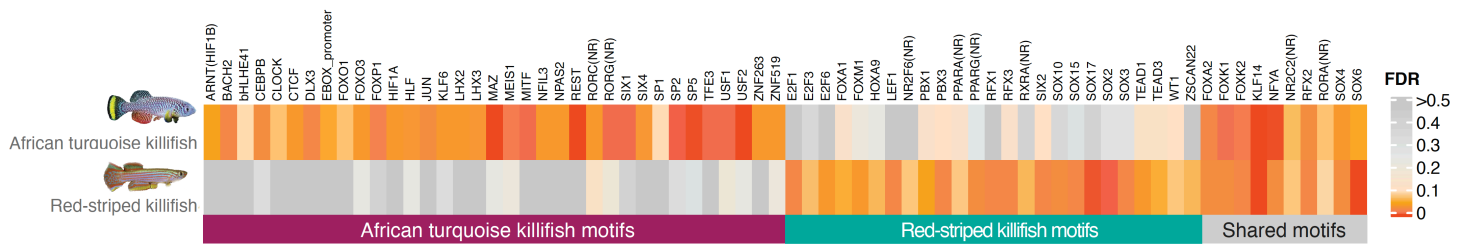

1650 **Figure S17. Transcription-factor binding motifs enrichment using alignment-free approaches. (A-B)**  
1651 Comparison of enriched transcription-factor binding motifs between African turquoise killifish promoters  
1652 and lyretail killifish promoters (A) and red-striped killifish promoters (B). To produce an enrichment set  
1653 without the use of a species whole genome multi-alignment, all accessible chromatin regions (ATAC-seq  
1654 peaks) located in the promoters of diapause-specialized genes (African turquoise killifish) and their  
1655 orthologs in lyretail or red-striped killifish were used. Similar to the alignment-based comparison (Fig. 4B,  
1656 fig. S11), most promoter motifs are also species specific suggesting they evolved recently. Diapause  
1657 specific motifs such as FOXO and REST are also only enriched in the African turquoise killifish promoters  
1658 and not in lyretail or red-striped killifish promoters.

1659 **SUPPLEMENTARY TABLE**1660 **Table S1:** Killifish and outgroup species used in this study.

| <b>Common name</b>          | <b>Scientific name</b>         | <b>Group</b>                      | <b>Genome assembly</b>              |
|-----------------------------|--------------------------------|-----------------------------------|-------------------------------------|
| African turquoise killifish | <i>Nothobranchius furzeri</i>  | African<br>(with diapause)        | Nfu_20140520 (8)                    |
| Lyretail killifish          | <i>Aphyosemion australe</i>    | African<br>(without diapause)     | MPIBA_Aaus_1.0 (26)                 |
| Red-striped killifish       | <i>Aphyosemion striatum</i>    | African<br>(without diapause)     | MPIBA_Aaus_1.0 (26)                 |
| South American killifish    | <i>Austrofundulus limnaeus</i> | South American<br>(with diapause) | Austrofundulus_limnaeus<br>-1.0 (9) |
| Medaka                      | <i>Oryzias latipes</i>         | Outgroup<br>(without diapause)    | ASM223467v1 (130)                   |
| Zebrafish                   | <i>Danio rerio</i>             | Outgroup<br>(without diapause)    | GRCz11 (131)                        |

1661 **LIST OF SUPPLEMENTARY DATA FILES**

1662

1663 **Data File S1:** Accession numbers and details of the datasets generated and used in this study.

1664

1665 **Data File S2:** Specialized paralogs in African turquoise killifish generated by OrthoFinder with  
1666 71 species used for the analysis.

1667

1668 **Data File S3:** Diapause-specific ATAC-seq peaks in African turquoise killifish, time of their  
1669 origin, their closest genes, and their positive selection status.

1670

1671 **Data File S4:** Protein coding genes under positive selection in the ancestor of African turquoise  
1672 killifish at the time of diapause evolution.

1673

1674 **Data File S5:** Enriched Gene Ontology functions for diapause gene expression of paralogs and  
1675 diapause specific ATAC-seq data.

1676

1677 **Data File S6:** Enriched Gene Ontology functions for diapause specific ATAC-seq peaks under  
1678 positive selection.

1679

1680 **Data File S7:** Upstream regulators of paralog gene expression predicted using Ingenuity  
1681 Pathway Analysis (IPA).

1682

1683 **Data File S8:** Diapause-specific changes in the lipidome of the African turquoise and red-striped  
1684 killifish.
